# Supplementary material for: Citizenship, Migration and Mobility in a Pandemic (CMMP): A global dataset of COVID-19 restrictions on human movement
Source: PLoS One. 2021 Mar 9;16(3):e0248066. doi: 10.1371/journal.pone.0248066 (PMC7943018; doi:10.1371/journal.pone.0248066)
Supplement: S1 Validity test — (XLSX) [file pone.0248066.s003.xlsx]

## Sheet: Validation
Country	Restriction	Based on	Qualifier	TargetGroup	DB-FromDate	DB-ToDate	DB-Days	CHECK-FromDate	CHECK-ToDate	CHECK-Days	1289	97.5038	%	1322	lines
Brazil	No entry	Presence	Exception	Family of residents / nationals	2020-03-25	2020-06-22	91	2020-04-01	2020-03-31	39	1			1
Brazil	No entry	Presence	Exception	Government authorisation	2020-03-25	2020-06-22	175	2020-04-01	2020-03-31	39	1			1
Brazil	No entry	Presence	Exception	Humanitarian / aid workers				2020-04-01	2020-03-31	39	0			1
Brazil	No entry	Presence	Exception	Long-term visa	2020-03-29	2020-06-22	86				0			1
Brazil	No entry	Presence	Exception	Nationals	2020-03-25	2020-06-29	97	2020-04-01	2020-03-31	44	1			1
Brazil	No entry	Presence	Exception	Official delegations	2020-03-25	2020-06-22	176	2020-04-01	2020-03-31	39	1			1
Brazil	No entry	Presence	Exception	Other exception (specific)				2020-04-01	2020-03-31	39	0			1
Brazil	No entry	Presence	Exception	Passengers in transit	2020-03-29	2020-03-29	1				0			1
Brazil	No entry	Presence	Exception	Residents	2020-03-25	2020-06-29	97	2020-04-01	2020-03-31	44	1			1
Brazil	No entry	Presence	Exception	Transport personnel				2020-03-23	2020-03-29	7	0			1
Brazil	No entry	Presence	Target	Afghanistan	2020-03-30	2020-06-29	92	2020-04-01	2020-03-31	32	1			1
Brazil	No entry	Presence	Target	Albania	2020-03-30	2020-06-29	92	2020-04-01	2020-03-31	32	1			1
Brazil	No entry	Presence	Target	Algeria	2020-03-30	2020-06-29	92	2020-04-01	2020-03-31	32	1			1
Brazil	No entry	Presence	Target	Andorra	2020-03-30	2020-06-29	92	2020-04-01	2020-03-31	32	1			1
Brazil	No entry	Presence	Target	Angola	2020-03-30	2020-06-29	92	2020-04-01	2020-03-31	32	1			1
Brazil	No entry	Presence	Target	Antigua and Barbuda	2020-03-30	2020-06-29	92	2020-04-01	2020-03-31	32	1			1
Brazil	No entry	Presence	Target	Argentina	2020-03-30	2020-06-29	92	2020-04-01	2020-03-31	36	1			1
Brazil	No entry	Presence	Target	Armenia	2020-03-30	2020-06-29	92	2020-04-01	2020-03-31	32	1			1
Brazil	No entry	Presence	Target	Australia	2020-03-25	2020-06-29	97	2020-04-01	2020-03-31	39	1			1
Brazil	No entry	Presence	Target	Austria	2020-03-25	2020-06-29	97	2020-04-01	2020-03-31	39	1			1
Brazil	No entry	Presence	Target	Azerbaijan	2020-03-30	2020-06-29	92	2020-04-01	2020-03-31	32	1			1
Brazil	No entry	Presence	Target	Bahamas	2020-03-30	2020-06-29	92	2020-04-01	2020-03-31	32	1			1
Brazil	No entry	Presence	Target	Bahrain	2020-03-30	2020-06-29	92	2020-04-01	2020-03-31	32	1			1
Brazil	No entry	Presence	Target	Bangladesh	2020-03-30	2020-06-29	92	2020-04-01	2020-03-31	32	1			1
Brazil	No entry	Presence	Target	Barbados	2020-03-30	2020-06-29	92	2020-04-01	2020-03-31	32	1			1
Brazil	No entry	Presence	Target	Belarus	2020-03-30	2020-06-29	92	2020-04-01	2020-03-31	32	1			1
Brazil	No entry	Presence	Target	Belgium	2020-03-25	2020-06-29	97	2020-04-01	2020-03-31	39	1			1
Brazil	No entry	Presence	Target	Belize	2020-03-30	2020-06-29	92	2020-04-01	2020-03-31	32	1			1
Brazil	No entry	Presence	Target	Benin	2020-03-30	2020-06-29	92	2020-04-01	2020-03-31	32	1			1
Brazil	No entry	Presence	Target	Bermuda	2020-03-30	2020-06-29	92	2020-04-01	2020-03-31	32	1			1
Brazil	No entry	Presence	Target	Bhutan	2020-03-30	2020-06-29	92	2020-04-01	2020-03-31	32	1			1
Brazil	No entry	Presence	Target	Bolivia	2020-03-30	2020-06-29	92	2020-04-01	2020-03-31	36	1			1
Brazil	No entry	Presence	Target	Bosnia and Herzegovina	2020-03-30	2020-06-29	92	2020-04-01	2020-03-31	32	1			1
Brazil	No entry	Presence	Target	Botswana	2020-03-30	2020-06-29	92	2020-04-01	2020-03-31	32	1			1
Brazil	No entry	Presence	Target	Brazil	2020-03-30	2020-06-29	92	2020-04-01	2020-03-31	32	1			1
Brazil	No entry	Presence	Target	British Virgin Islands	2020-03-30	2020-06-29	92	2020-04-01	2020-03-31	32	1			1
Brazil	No entry	Presence	Target	Brunei	2020-03-30	2020-06-29	92	2020-04-01	2020-03-31	32	1			1
Brazil	No entry	Presence	Target	Bulgaria	2020-03-25	2020-06-29	97	2020-04-01	2020-03-31	39	1			1
Brazil	No entry	Presence	Target	Burkina Faso	2020-03-30	2020-06-29	92	2020-04-01	2020-03-31	32	1			1
Brazil	No entry	Presence	Target	Burundi	2020-03-30	2020-06-29	92	2020-04-01	2020-03-31	32	1			1
Brazil	No entry	Presence	Target	Buthan				2020-04-01	2020-03-31	32	0			1
Brazil	No entry	Presence	Target	Cambodia	2020-03-30	2020-06-29	92	2020-04-01	2020-03-31	32	1			1
Brazil	No entry	Presence	Target	Cameroon	2020-03-30	2020-06-29	92	2020-04-01	2020-03-31	32	1			1
Brazil	No entry	Presence	Target	Canada	2020-03-30	2020-06-29	92	2020-04-01	2020-03-31	32	1			1
Brazil	No entry	Presence	Target	Cape Verde	2020-03-30	2020-06-29	92	2020-04-01	2020-03-31	32	1			1
Brazil	No entry	Presence	Target	Cayman Islands	2020-03-30	2020-06-29	92	2020-04-01	2020-03-31	32	1			1
Brazil	No entry	Presence	Target	Central African Republic	2020-03-30	2020-06-29	92	2020-04-01	2020-03-31	32	1			1
Brazil	No entry	Presence	Target	Chad	2020-03-30	2020-06-29	92	2020-04-01	2020-03-31	32	1			1
Brazil	No entry	Presence	Target	Chile	2020-03-30	2020-06-29	92	2020-04-01	2020-03-31	32	1			1
Brazil	No entry	Presence	Target	China	2020-03-25	2020-06-29	97	2020-04-01	2020-03-31	39	1			1
Brazil	No entry	Presence	Target	Colombia	2020-03-30	2020-06-29	92	2020-04-01	2020-03-31	36	1			1
Brazil	No entry	Presence	Target	Comoros	2020-03-30	2020-06-29	92	2020-04-01	2020-03-31	32	1			1
Brazil	No entry	Presence	Target	Congo (Brazzaville)	2020-03-30	2020-06-29	92	2020-04-01	2020-03-31	32	1			1
Brazil	No entry	Presence	Target	Congo (Kinshasa)	2020-03-30	2020-06-29	92	2020-04-01	2020-03-31	32	1			1
Brazil	No entry	Presence	Target	Costa Rica	2020-03-30	2020-06-29	92	2020-04-01	2020-03-31	32	1			1
Brazil	No entry	Presence	Target	Côte d'Ivoire	2020-03-30	2020-06-29	92	2020-04-01	2020-03-31	32	1			1
Brazil	No entry	Presence	Target	Croatia	2020-03-25	2020-06-29	97	2020-04-01	2020-03-31	39	1			1
Brazil	No entry	Presence	Target	Cuba	2020-03-30	2020-06-29	92	2020-04-01	2020-03-31	32	1			1
Brazil	No entry	Presence	Target	Curaçao	2020-03-30	2020-06-29	92	2020-04-01	2020-03-31	32	1			1
Brazil	No entry	Presence	Target	Cyprus	2020-03-25	2020-06-29	97	2020-04-01	2020-03-31	39	1			1
Brazil	No entry	Presence	Target	Czech Republic	2020-03-25	2020-06-29	189	2020-04-01	2020-03-31	39	1			1
Brazil	No entry	Presence	Target	Denmark	2020-03-25	2020-06-29	97	2020-04-01	2020-03-31	39	1			1
Brazil	No entry	Presence	Target	Djibouti	2020-03-30	2020-06-29	92	2020-04-01	2020-03-31	32	1			1
Brazil	No entry	Presence	Target	Dominica	2020-03-30	2020-06-29	92	2020-04-01	2020-03-31	32	1			1
Brazil	No entry	Presence	Target	Dominican Republic	2020-03-30	2020-06-29	92	2020-04-01	2020-03-31	32	1			1
Brazil	No entry	Presence	Target	Ecuador	2020-03-30	2020-06-29	92	2020-04-01	2020-03-31	32	1			1
Brazil	No entry	Presence	Target	Egypt	2020-03-30	2020-06-29	92	2020-04-01	2020-03-31	32	1			1
Brazil	No entry	Presence	Target	El Salvador	2020-03-30	2020-06-29	92	2020-04-01	2020-03-31	32	1			1
Brazil	No entry	Presence	Target	Equatorial Guinea	2020-03-30	2020-06-29	92	2020-04-01	2020-03-31	32	1			1
Brazil	No entry	Presence	Target	Eritrea	2020-03-30	2020-06-29	92	2020-04-01	2020-03-31	32	1			1
Brazil	No entry	Presence	Target	Estonia	2020-03-25	2020-06-29	97	2020-04-01	2020-03-31	39	1			1
Brazil	No entry	Presence	Target	Ethiopia	2020-03-30	2020-06-29	92	2020-04-01	2020-03-31	32	1			1
Brazil	No entry	Presence	Target	Faeroe Islands	2020-03-30	2020-06-29	92	2020-04-01	2020-03-31	32	1			1
Brazil	No entry	Presence	Target	Falkland Islands	2020-03-30	2020-06-29	92	2020-04-01	2020-03-31	32	1			1
Brazil	No entry	Presence	Target	Fiji	2020-03-30	2020-06-29	92	2020-04-01	2020-03-31	32	1			1
Brazil	No entry	Presence	Target	Finland	2020-03-25	2020-06-29	97	2020-04-01	2020-03-31	39	1			1
Brazil	No entry	Presence	Target	France	2020-03-25	2020-06-29	97	2020-04-01	2020-03-31	39	1			1
Brazil	No entry	Presence	Target	Gabon	2020-03-30	2020-06-29	92	2020-04-01	2020-03-31	32	1			1
Brazil	No entry	Presence	Target	Gambia	2020-03-30	2020-06-29	92	2020-04-01	2020-03-31	32	1			1
Brazil	No entry	Presence	Target	Georgia	2020-03-30	2020-06-29	92	2020-04-01	2020-03-31	32	1			1
Brazil	No entry	Presence	Target	Germany	2020-03-25	2020-06-29	97	2020-04-01	2020-03-31	39	1			1
Brazil	No entry	Presence	Target	Ghana	2020-03-30	2020-06-29	92	2020-04-01	2020-03-31	32	1			1
Brazil	No entry	Presence	Target	Gibraltar	2020-03-30	2020-06-29	92	2020-04-01	2020-03-31	32	1			1
Brazil	No entry	Presence	Target	Greece	2020-03-25	2020-06-29	97	2020-04-01	2020-03-31	39	1			1
Brazil	No entry	Presence	Target	Grenada	2020-03-30	2020-06-29	92	2020-04-01	2020-03-31	32	1			1
Brazil	No entry	Presence	Target	Guadeloupe	2020-03-30	2020-06-29	92	2020-04-01	2020-03-31	32	1			1
Brazil	No entry	Presence	Target	Guam	2020-03-30	2020-06-29	92	2020-04-01	2020-03-31	32	1			1
Brazil	No entry	Presence	Target	Guatemala	2020-03-30	2020-06-29	92	2020-04-01	2020-03-31	32	1			1
Brazil	No entry	Presence	Target	Guinea	2020-03-30	2020-06-29	92	2020-04-01	2020-03-31	32	1			1
Brazil	No entry	Presence	Target	Guinea-Bissau	2020-03-30	2020-06-29	92	2020-04-01	2020-03-31	32	1			1
Brazil	No entry	Presence	Target	Guyana	2020-03-30	2020-06-29	92	2020-04-01	2020-03-31	36	1			1
Brazil	No entry	Presence	Target	Haiti	2020-03-30	2020-06-29	92	2020-04-01	2020-03-31	32	1			1
Brazil	No entry	Presence	Target	Honduras	2020-03-30	2020-06-29	92	2020-04-01	2020-03-31	32	1			1
Brazil	No entry	Presence	Target	Hong Kong	2020-03-30	2020-06-29	92	2020-04-01	2020-03-31	32	1			1
Brazil	No entry	Presence	Target	Hungary	2020-03-25	2020-06-29	97	2020-04-01	2020-03-31	39	1			1
Brazil	No entry	Presence	Target	Iceland	2020-03-25	2020-06-29	97	2020-04-01	2020-03-31	39	1			1
Brazil	No entry	Presence	Target	India	2020-03-30	2020-06-29	92	2020-04-01	2020-03-31	32	1			1
Brazil	No entry	Presence	Target	Indonesia	2020-03-30	2020-06-29	92	2020-04-01	2020-03-31	32	1			1
Brazil	No entry	Presence	Target	Iran	2020-03-25	2020-06-29	97	2020-04-01	2020-03-31	32	1			1
Brazil	No entry	Presence	Target	Iraq	2020-03-30	2020-06-29	92	2020-04-01	2020-03-31	32	1			1
Brazil	No entry	Presence	Target	Ireland	2020-03-25	2020-06-29	97	2020-04-01	2020-03-31	32	1			1
Brazil	No entry	Presence	Target	Israel	2020-03-30	2020-06-29	92	2020-04-01	2020-03-31	32	1			1
Brazil	No entry	Presence	Target	Italy	2020-03-25	2020-06-29	97	2020-04-01	2020-03-31	39	1			1
Brazil	No entry	Presence	Target	Jamaica	2020-03-30	2020-06-29	92	2020-04-01	2020-03-31	32	1			1
Brazil	No entry	Presence	Target	Japan	2020-03-25	2020-06-29	97	2020-04-01	2020-03-31	39	1			1
Brazil	No entry	Presence	Target	Jordan	2020-03-30	2020-06-29	92	2020-04-01	2020-03-31	32	1			1
Brazil	No entry	Presence	Target	Kazakhstan	2020-03-30	2020-06-29	92	2020-04-01	2020-03-31	32	1			1
Brazil	No entry	Presence	Target	Kenya	2020-03-30	2020-06-29	92	2020-04-01	2020-03-31	32	1			1
Brazil	No entry	Presence	Target	Kosovo	2020-03-30	2020-06-29	92	2020-04-01	2020-03-31	32	1			1
Brazil	No entry	Presence	Target	Kuwait	2020-03-30	2020-06-29	92	2020-04-01	2020-03-31	32	1			1
Brazil	No entry	Presence	Target	Kyrgyzstan	2020-03-30	2020-06-29	92	2020-04-01	2020-03-31	32	1			1
Brazil	No entry	Presence	Target	Laos	2020-03-30	2020-06-29	92	2020-04-01	2020-03-31	32	1			1
Brazil	No entry	Presence	Target	Latvia	2020-03-25	2020-06-29	97	2020-04-01	2020-03-31	39	1			1
Brazil	No entry	Presence	Target	Lebanon	2020-03-30	2020-06-29	92	2020-04-01	2020-03-31	32	1			1
Brazil	No entry	Presence	Target	Lesotho	2020-03-30	2020-06-29	92	2020-04-01	2020-03-31	32	1			1
Brazil	No entry	Presence	Target	Liberia	2020-03-30	2020-06-29	92	2020-04-01	2020-03-31	32	1			1
Brazil	No entry	Presence	Target	Libya	2020-03-30	2020-06-29	92	2020-04-01	2020-03-31	32	1			1
Brazil	No entry	Presence	Target	Liechtenstein	2020-03-25	2020-06-29	97	2020-04-01	2020-03-31	39	1			1
Brazil	No entry	Presence	Target	Lithuania	2020-03-25	2020-06-29	97	2020-04-01	2020-03-31	39	1			1
Brazil	No entry	Presence	Target	Luxembourg	2020-03-25	2020-06-29	97	2020-04-01	2020-03-31	39	1			1
Brazil	No entry	Presence	Target	Macao	2020-03-30	2020-06-29	92	2020-04-01	2020-03-31	32	1			1
Brazil	No entry	Presence	Target	Macedonia	2020-03-30	2020-06-29	92	2020-04-01	2020-03-31	32	1			1
Brazil	No entry	Presence	Target	Madagascar	2020-03-30	2020-06-29	92	2020-04-01	2020-03-31	32	1			1
Brazil	No entry	Presence	Target	Malawi	2020-03-30	2020-06-29	92	2020-04-01	2020-03-31	32	1			1
Brazil	No entry	Presence	Target	Malaysia	2020-03-25	2020-06-29	97	2020-04-01	2020-03-31	39	1			1
Brazil	No entry	Presence	Target	Maldives	2020-03-30	2020-06-29	92	2020-04-01	2020-03-31	32	1			1
Brazil	No entry	Presence	Target	Mali	2020-03-30	2020-06-29	92	2020-04-01	2020-03-31	32	1			1
Brazil	No entry	Presence	Target	Malta	2020-03-25	2020-06-29	97	2020-04-01	2020-03-31	39	1			1
Brazil	No entry	Presence	Target	Mauritania	2020-03-30	2020-06-29	92	2020-04-01	2020-03-31	32	1			1
Brazil	No entry	Presence	Target	Mauritius	2020-03-30	2020-06-29	92	2020-04-01	2020-03-31	32	1			1
Brazil	No entry	Presence	Target	Mexico	2020-03-30	2020-06-29	92	2020-04-01	2020-03-31	32	1			1
Brazil	No entry	Presence	Target	Micronesia	2020-03-30	2020-06-29	92	2020-04-01	2020-03-31	32	1			1
Brazil	No entry	Presence	Target	Moldova	2020-03-30	2020-06-29	92	2020-04-01	2020-03-31	32	1			1
Brazil	No entry	Presence	Target	Monaco	2020-03-30	2020-06-29	92	2020-04-01	2020-03-31	32	1			1
Brazil	No entry	Presence	Target	Mongolia	2020-03-30	2020-06-29	92	2020-04-01	2020-03-31	32	1			1
Brazil	No entry	Presence	Target	Montenegro	2020-03-30	2020-06-29	92	2020-04-01	2020-03-31	32	1			1
Brazil	No entry	Presence	Target	Montserrat	2020-03-30	2020-06-29	92	2020-04-01	2020-03-31	32	1			1
Brazil	No entry	Presence	Target	Morocco	2020-03-30	2020-06-29	92	2020-04-01	2020-03-31	32	1			1
Brazil	No entry	Presence	Target	Mozambique	2020-03-30	2020-06-29	92	2020-04-01	2020-03-31	32	1			1
Brazil	No entry	Presence	Target	Myanmar	2020-03-30	2020-06-29	92	2020-04-01	2020-03-31	32	1			1
Brazil	No entry	Presence	Target	Namibia	2020-03-30	2020-06-29	92	2020-04-01	2020-03-31	32	1			1
Brazil	No entry	Presence	Target	Nauru	2020-03-30	2020-06-29	92	2020-04-01	2020-03-31	32	1			1
Brazil	No entry	Presence	Target	Nepal	2020-03-30	2020-06-29	92	2020-04-01	2020-03-31	32	1			1
Brazil	No entry	Presence	Target	Netherlands	2020-03-25	2020-06-29	97	2020-04-01	2020-03-31	39	1			1
Brazil	No entry	Presence	Target	New Caledonia	2020-03-30	2020-06-29	92	2020-04-01	2020-03-31	32	1			1
Brazil	No entry	Presence	Target	New Zealand	2020-03-30	2020-06-29	92	2020-04-01	2020-03-31	32	1			1
Brazil	No entry	Presence	Target	Nicaragua	2020-03-30	2020-06-29	92	2020-04-01	2020-03-31	32	1			1
Brazil	No entry	Presence	Target	Niger	2020-03-30	2020-06-29	92	2020-04-01	2020-03-31	32	1			1
Brazil	No entry	Presence	Target	Nigeria	2020-03-30	2020-06-29	92	2020-04-01	2020-03-31	32	1			1
Brazil	No entry	Presence	Target	North Korea	2020-03-30	2020-06-29	92	2020-04-01	2020-03-31	32	1			1
Brazil	No entry	Presence	Target	Norway	2020-03-25	2020-06-29	97	2020-04-01	2020-03-31	39	1			1
Brazil	No entry	Presence	Target	Oman	2020-03-30	2020-06-29	92	2020-04-01	2020-03-31	32	1			1
Brazil	No entry	Presence	Target	Pakistan	2020-03-30	2020-06-29	92	2020-04-01	2020-03-31	32	1			1
Brazil	No entry	Presence	Target	Palau	2020-03-30	2020-06-29	92	2020-04-01	2020-03-31	32	1			1
Brazil	No entry	Presence	Target	Palestine	2020-03-30	2020-06-29	92	2020-04-01	2020-03-31	32	1			1
Brazil	No entry	Presence	Target	Panama	2020-03-30	2020-06-29	92	2020-04-01	2020-03-31	32	1			1
Brazil	No entry	Presence	Target	Papua New Guinea	2020-03-30	2020-06-29	92	2020-04-01	2020-03-31	32	1			1
Brazil	No entry	Presence	Target	Paraguay	2020-03-30	2020-06-29	92	2020-04-01	2020-03-31	36	1			1
Brazil	No entry	Presence	Target	Peru	2020-03-30	2020-06-29	92	2020-04-01	2020-03-31	36	1			1
Brazil	No entry	Presence	Target	Philippines	2020-03-30	2020-06-29	92	2020-04-01	2020-03-31	32	1			1
Brazil	No entry	Presence	Target	Poland	2020-03-25	2020-06-29	97	2020-04-01	2020-03-31	39	1			1
Brazil	No entry	Presence	Target	Portugal	2020-03-25	2020-06-29	97	2020-04-01	2020-03-31	39	1			1
Brazil	No entry	Presence	Target	Qatar	2020-03-30	2020-06-29	92	2020-04-01	2020-03-31	32	1			1
Brazil	No entry	Presence	Target	Romania	2020-03-25	2020-06-29	97	2020-04-01	2020-03-31	39	1			1
Brazil	No entry	Presence	Target	Russia	2020-03-30	2020-06-29	92	2020-04-01	2020-03-31	32	1			1
Brazil	No entry	Presence	Target	Rwanda	2020-03-30	2020-06-29	92	2020-04-01	2020-03-31	32	1			1
Brazil	No entry	Presence	Target	Saint Kitts and Nevis	2020-03-30	2020-06-29	92	2020-04-01	2020-03-31	32	1			1
Brazil	No entry	Presence	Target	Saint Lucia	2020-03-30	2020-06-29	92	2020-04-01	2020-03-31	32	1			1
Brazil	No entry	Presence	Target	Saint Pierre and Miquelon	2020-03-30	2020-06-29	92	2020-04-01	2020-03-31	32	1			1
Brazil	No entry	Presence	Target	Saint Vincent and the Grenadines	2020-03-30	2020-06-29	92	2020-04-01	2020-03-31	32	1			1
Brazil	No entry	Presence	Target	Samoa	2020-03-30	2020-06-29	92	2020-04-01	2020-03-31	32	1			1
Brazil	No entry	Presence	Target	San Marino	2020-03-30	2020-06-29	92	2020-04-01	2020-03-31	32	1			1
Brazil	No entry	Presence	Target	São Tomé and Príncipe	2020-03-30	2020-06-29	92	2020-04-01	2020-03-31	32	1			1
Brazil	No entry	Presence	Target	Saudi Arabia	2020-03-30	2020-06-29	92	2020-04-01	2020-03-31	32	1			1
Brazil	No entry	Presence	Target	Senegal	2020-03-30	2020-06-29	92	2020-04-01	2020-03-31	32	1			1
Brazil	No entry	Presence	Target	Serbia	2020-03-30	2020-06-29	184	2020-04-01	2020-03-31	32	1			1
Brazil	No entry	Presence	Target	Seychelles	2020-03-30	2020-06-29	92	2020-04-01	2020-03-31	32	1			1
Brazil	No entry	Presence	Target	Sierra Leone	2020-03-30	2020-06-29	92	2020-04-01	2020-03-31	32	1			1
Brazil	No entry	Presence	Target	Singapore	2020-03-30	2020-06-29	92	2020-04-01	2020-03-31	32	1			1
Brazil	No entry	Presence	Target	Slovakia	2020-03-25	2020-06-29	97	2020-04-01	2020-03-31	39	1			1
Brazil	No entry	Presence	Target	Slovenia	2020-03-25	2020-06-29	97	2020-04-01	2020-03-31	39	1			1
Brazil	No entry	Presence	Target	Solomon Islands	2020-03-30	2020-06-29	92	2020-04-01	2020-03-31	32	1			1
Brazil	No entry	Presence	Target	Somalia	2020-03-30	2020-06-29	92	2020-04-01	2020-03-31	32	1			1
Brazil	No entry	Presence	Target	South Africa	2020-03-30	2020-06-29	92	2020-04-01	2020-03-31	32	1			1
Brazil	No entry	Presence	Target	South Korea	2020-03-25	2020-06-29	97	2020-04-01	2020-03-31	39	1			1
Brazil	No entry	Presence	Target	South Sudan	2020-03-30	2020-06-29	92	2020-04-01	2020-03-31	32	1			1
Brazil	No entry	Presence	Target	Spain	2020-03-25	2020-06-29	189	2020-04-01	2020-03-31	39	1			1
Brazil	No entry	Presence	Target	Sri Lanka	2020-03-30	2020-06-29	92	2020-04-01	2020-03-31	32	1			1
Brazil	No entry	Presence	Target	Sudan	2020-03-30	2020-06-29	92	2020-04-01	2020-03-31	32	1			1
Brazil	No entry	Presence	Target	Suriname	2020-03-30	2020-06-29	92	2020-04-01	2020-03-31	36	1			1
Brazil	No entry	Presence	Target	Svalbard and Jan Mayen	2020-03-30	2020-06-29	92	2020-04-01	2020-03-31	32	1			1
Brazil	No entry	Presence	Target	Swaziland	2020-03-30	2020-06-29	92	2020-04-01	2020-03-31	32	1			1
Brazil	No entry	Presence	Target	Sweden	2020-03-25	2020-06-29	97	2020-04-01	2020-03-31	39	1			1
Brazil	No entry	Presence	Target	Switzerland	2020-03-25	2020-06-29	97	2020-04-01	2020-03-31	39	1			1
Brazil	No entry	Presence	Target	Syria	2020-03-30	2020-06-29	92	2020-04-01	2020-03-31	32	1			1
Brazil	No entry	Presence	Target	Taiwan	2020-03-30	2020-06-29	92	2020-04-01	2020-03-31	32	1			1
Brazil	No entry	Presence	Target	Tajikistan	2020-03-30	2020-06-29	92	2020-04-01	2020-03-31	32	1			1
Brazil	No entry	Presence	Target	Tanzania	2020-03-30	2020-06-29	92	2020-04-01	2020-03-31	32	1			1
Brazil	No entry	Presence	Target	Thailand	2020-03-30	2020-06-29	92	2020-04-01	2020-03-31	32	1			1
Brazil	No entry	Presence	Target	Timor-Leste	2020-03-30	2020-06-29	92	2020-04-01	2020-03-31	32	1			1
Brazil	No entry	Presence	Target	Togo	2020-03-30	2020-06-29	92	2020-04-01	2020-03-31	32	1			1
Brazil	No entry	Presence	Target	Tonga	2020-03-30	2020-06-29	92	2020-04-01	2020-03-31	32	1			1
Brazil	No entry	Presence	Target	Trinidad and Tobago	2020-03-30	2020-06-29	92	2020-04-01	2020-03-31	32	1			1
Brazil	No entry	Presence	Target	Tunisia	2020-03-30	2020-06-29	92	2020-04-01	2020-03-31	32	1			1
Brazil	No entry	Presence	Target	Turkey	2020-03-30	2020-06-29	92	2020-04-01	2020-03-31	32	1			1
Brazil	No entry	Presence	Target	Turkmenistan	2020-03-30	2020-06-29	92	2020-04-01	2020-03-31	32	1			1
Brazil	No entry	Presence	Target	Tuvalu	2020-03-30	2020-06-29	92	2020-04-01	2020-03-31	32	1			1
Brazil	No entry	Presence	Target	Uganda	2020-03-30	2020-06-29	92	2020-04-01	2020-03-31	32	1			1
Brazil	No entry	Presence	Target	Ukraine	2020-03-30	2020-06-29	92	2020-04-01	2020-03-31	32	1			1
Brazil	No entry	Presence	Target	United Arab Emirates	2020-03-30	2020-06-29	92	2020-04-01	2020-03-31	32	1			1
Brazil	No entry	Presence	Target	United Kingdom	2020-03-30	2020-06-29	92	2020-04-01	2020-03-31	39	1			1
Brazil	No entry	Presence	Target	United States	2020-03-30	2020-06-29	184	2020-04-01	2020-03-31	32	1			1
Brazil	No entry	Presence	Target	Uruguay	2020-03-30	2020-06-29	92	2020-04-01	2020-03-31	32	1			1
Brazil	No entry	Presence	Target	Uzbekistan	2020-03-30	2020-06-29	92	2020-04-01	2020-03-31	32	1			1
Brazil	No entry	Presence	Target	Vanuatu	2020-03-30	2020-06-29	92	2020-04-01	2020-03-31	32	1			1
Brazil	No entry	Presence	Target	Vatican City	2020-03-30	2020-06-29	92	2020-04-01	2020-03-31	32	1			1
Brazil	No entry	Presence	Target	Venezuela	2020-03-30	2020-06-29	92	2020-04-01	2020-03-31	44	1			1
Brazil	No entry	Presence	Target	Vietnam	2020-03-30	2020-06-29	92	2020-04-01	2020-03-31	32	1			1
Brazil	No entry	Presence	Target	Western Sahara	2020-03-30	2020-06-29	92	2020-04-01	2020-03-31	32	1			1
Brazil	No entry	Presence	Target	Yemen	2020-03-30	2020-06-29	92	2020-04-01	2020-03-31	32	1			1
Brazil	No entry	Presence	Target	Zambia	2020-03-30	2020-06-29	92	2020-04-01	2020-03-31	32	1			1
Brazil	No entry	Presence	Target	Zimbabwe	2020-03-30	2020-06-29	92	2020-04-01	2020-03-31	32	1			1
Morocco	No entry	Presence	Exception	Government authorisation	2020-05-26	2020-06-29	35				0			1
Morocco	No entry	Presence	Target	Afghanistan	2020-03-30	2020-06-29	92	2020-04-01	2020-03-31	32	1			1
Morocco	No entry	Presence	Target	Albania	2020-03-30	2020-06-29	92	2020-04-01	2020-03-31	32	1			1
Morocco	No entry	Presence	Target	Algeria	2020-03-30	2020-06-29	92	2020-04-01	2020-03-31	32	1			1
Morocco	No entry	Presence	Target	Andorra	2020-03-30	2020-06-29	92	2020-04-01	2020-03-31	32	1			1
Morocco	No entry	Presence	Target	Angola	2020-03-30	2020-06-29	92	2020-04-01	2020-03-31	32	1			1
Morocco	No entry	Presence	Target	Antigua and Barbuda	2020-03-30	2020-06-29	92	2020-04-01	2020-03-31	32	1			1
Morocco	No entry	Presence	Target	Argentina	2020-03-30	2020-06-29	92	2020-04-01	2020-03-31	32	1			1
Morocco	No entry	Presence	Target	Armenia	2020-03-30	2020-06-29	92	2020-04-01	2020-03-31	32	1			1
Morocco	No entry	Presence	Target	Australia	2020-03-30	2020-06-29	92	2020-04-01	2020-03-31	32	1			1
Morocco	No entry	Presence	Target	Austria	2020-03-30	2020-06-29	92	2020-04-01	2020-03-31	32	1			1
Morocco	No entry	Presence	Target	Azerbaijan	2020-03-30	2020-06-29	92	2020-04-01	2020-03-31	32	1			1
Morocco	No entry	Presence	Target	Bahamas	2020-03-30	2020-06-29	92	2020-04-01	2020-03-31	32	1			1
Morocco	No entry	Presence	Target	Bahrain	2020-03-30	2020-06-29	92	2020-04-01	2020-03-31	32	1			1
Morocco	No entry	Presence	Target	Bangladesh	2020-03-30	2020-06-29	92	2020-04-01	2020-03-31	32	1			1
Morocco	No entry	Presence	Target	Barbados	2020-03-30	2020-06-29	92	2020-04-01	2020-03-31	32	1			1
Morocco	No entry	Presence	Target	Belarus	2020-03-30	2020-06-29	92	2020-04-01	2020-03-31	32	1			1
Morocco	No entry	Presence	Target	Belgium	2020-03-30	2020-06-29	92	2020-04-01	2020-03-31	32	1			1
Morocco	No entry	Presence	Target	Belize	2020-03-30	2020-06-29	92	2020-04-01	2020-03-31	32	1			1
Morocco	No entry	Presence	Target	Benin	2020-03-30	2020-06-29	92	2020-04-01	2020-03-31	32	1			1
Morocco	No entry	Presence	Target	Bermuda	2020-03-30	2020-06-29	92	2020-04-01	2020-03-31	32	1			1
Morocco	No entry	Presence	Target	Bhutan	2020-03-30	2020-06-29	92	2020-04-01	2020-03-31	32	1			1
Morocco	No entry	Presence	Target	Bolivia	2020-03-30	2020-06-29	92	2020-04-01	2020-03-31	32	1			1
Morocco	No entry	Presence	Target	Bosnia and Herzegovina	2020-03-30	2020-06-29	92	2020-04-01	2020-03-31	32	1			1
Morocco	No entry	Presence	Target	Botswana	2020-03-30	2020-06-29	92	2020-04-01	2020-03-31	32	1			1
Morocco	No entry	Presence	Target	Brazil	2020-03-30	2020-06-29	92	2020-04-01	2020-03-31	32	1			1
Morocco	No entry	Presence	Target	British Virgin Islands	2020-03-30	2020-06-29	92	2020-04-01	2020-03-31	32	1			1
Morocco	No entry	Presence	Target	Brunei	2020-03-30	2020-06-29	92	2020-04-01	2020-03-31	32	1			1
Morocco	No entry	Presence	Target	Bulgaria	2020-03-30	2020-06-29	92	2020-04-01	2020-03-31	32	1			1
Morocco	No entry	Presence	Target	Burkina Faso	2020-03-30	2020-06-29	92	2020-04-01	2020-03-31	32	1			1
Morocco	No entry	Presence	Target	Burundi	2020-03-30	2020-06-29	92	2020-04-01	2020-03-31	32	1			1
Morocco	No Entry	Presence	Target	Buthan				2020-04-01	2020-03-31	32	0			1
Morocco	No entry	Presence	Target	Cambodia	2020-03-30	2020-06-29	92	2020-04-01	2020-03-31	32	1			1
Morocco	No entry	Presence	Target	Cameroon	2020-03-30	2020-06-29	92	2020-04-01	2020-03-31	32	1			1
Morocco	No entry	Presence	Target	Canada	2020-03-30	2020-06-29	92	2020-04-01	2020-03-31	32	1			1
Morocco	No entry	Presence	Target	Cape Verde	2020-03-30	2020-06-29	92	2020-04-01	2020-03-31	32	1			1
Morocco	No entry	Presence	Target	Cayman Islands	2020-03-30	2020-06-29	92	2020-04-01	2020-03-31	32	1			1
Morocco	No entry	Presence	Target	Central African Republic	2020-03-30	2020-06-29	92	2020-04-01	2020-03-31	32	1			1
Morocco	No entry	Presence	Target	Chad	2020-03-30	2020-06-29	92	2020-04-01	2020-03-31	32	1			1
Morocco	No entry	Presence	Target	Chile	2020-03-30	2020-06-29	92	2020-04-01	2020-03-31	32	1			1
Morocco	No entry	Presence	Target	China	2020-03-30	2020-06-29	92	2020-04-01	2020-03-31	32	1			1
Morocco	No entry	Presence	Target	Colombia	2020-03-30	2020-06-29	92	2020-04-01	2020-03-31	32	1			1
Morocco	No entry	Presence	Target	Comoros	2020-03-30	2020-06-29	92	2020-04-01	2020-03-31	32	1			1
Morocco	No entry	Presence	Target	Congo (Brazzaville)	2020-03-30	2020-06-29	92	2020-04-01	2020-03-31	32	1			1
Morocco	No entry	Presence	Target	Congo (Kinshasa)	2020-03-30	2020-06-29	92	2020-04-01	2020-03-31	32	1			1
Morocco	No entry	Presence	Target	Costa Rica	2020-03-30	2020-06-29	92	2020-04-01	2020-03-31	32	1			1
Morocco	No entry	Presence	Target	Côte d'Ivoire	2020-03-30	2020-06-29	92	2020-04-01	2020-03-31	32	1			1
Morocco	No entry	Presence	Target	Croatia	2020-03-30	2020-06-29	92	2020-04-01	2020-03-31	32	1			1
Morocco	No entry	Presence	Target	Cuba	2020-03-30	2020-06-29	92	2020-04-01	2020-03-31	32	1			1
Morocco	No entry	Presence	Target	Curaçao	2020-03-30	2020-06-29	92	2020-04-01	2020-03-31	32	1			1
Morocco	No entry	Presence	Target	Cyprus	2020-03-30	2020-06-29	92	2020-04-01	2020-03-31	32	1			1
Morocco	No entry	Presence	Target	Czech Republic	2020-03-30	2020-06-29	184	2020-04-01	2020-03-31	32	1			1
Morocco	No entry	Presence	Target	Denmark	2020-03-30	2020-06-29	92	2020-04-01	2020-03-31	32	1			1
Morocco	No entry	Presence	Target	Djibouti	2020-03-30	2020-06-29	92	2020-04-01	2020-03-31	32	1			1
Morocco	No entry	Presence	Target	Dominica	2020-03-30	2020-06-29	92	2020-04-01	2020-03-31	32	1			1
Morocco	No entry	Presence	Target	Dominican Republic	2020-03-30	2020-06-29	92	2020-04-01	2020-03-31	32	1			1
Morocco	No entry	Presence	Target	Ecuador	2020-03-30	2020-06-29	92	2020-04-01	2020-03-31	32	1			1
Morocco	No entry	Presence	Target	Egypt	2020-03-30	2020-06-29	92	2020-04-01	2020-03-31	32	1			1
Morocco	No entry	Presence	Target	El Salvador	2020-03-30	2020-06-29	92	2020-04-01	2020-03-31	32	1			1
Morocco	No entry	Presence	Target	Equatorial Guinea	2020-03-30	2020-06-29	92	2020-04-01	2020-03-31	32	1			1
Morocco	No entry	Presence	Target	Eritrea	2020-03-30	2020-06-29	92	2020-04-01	2020-03-31	32	1			1
Morocco	No entry	Presence	Target	Estonia	2020-03-30	2020-06-29	92	2020-04-01	2020-03-31	32	1			1
Morocco	No entry	Presence	Target	Ethiopia	2020-03-30	2020-06-29	92	2020-04-01	2020-03-31	32	1			1
Morocco	No entry	Presence	Target	Faeroe Islands	2020-03-30	2020-06-29	92	2020-04-01	2020-03-31	32	1			1
Morocco	No entry	Presence	Target	Falkland Islands	2020-03-30	2020-06-29	92	2020-04-01	2020-03-31	32	1			1
Morocco	No entry	Presence	Target	Fiji	2020-03-30	2020-06-29	92	2020-04-01	2020-03-31	32	1			1
Morocco	No entry	Presence	Target	Finland	2020-03-30	2020-06-29	92	2020-04-01	2020-03-31	32	1			1
Morocco	No entry	Presence	Target	France	2020-03-30	2020-06-29	92	2020-04-01	2020-03-31	32	1			1
Morocco	No entry	Presence	Target	Gabon	2020-03-30	2020-06-29	92	2020-04-01	2020-03-31	32	1			1
Morocco	No entry	Presence	Target	Gambia	2020-03-30	2020-06-29	92	2020-04-01	2020-03-31	32	1			1
Morocco	No entry	Presence	Target	Georgia	2020-03-30	2020-06-29	92	2020-04-01	2020-03-31	32	1			1
Morocco	No entry	Presence	Target	Germany	2020-03-30	2020-06-29	92	2020-04-01	2020-03-31	32	1			1
Morocco	No entry	Presence	Target	Ghana	2020-03-30	2020-06-29	92	2020-04-01	2020-03-31	32	1			1
Morocco	No entry	Presence	Target	Gibraltar	2020-03-30	2020-06-29	92	2020-04-01	2020-03-31	32	1			1
Morocco	No entry	Presence	Target	Greece	2020-03-30	2020-06-29	92	2020-04-01	2020-03-31	32	1			1
Morocco	No entry	Presence	Target	Grenada	2020-03-30	2020-06-29	92	2020-04-01	2020-03-31	32	1			1
Morocco	No entry	Presence	Target	Guadeloupe	2020-03-30	2020-06-29	92	2020-04-01	2020-03-31	32	1			1
Morocco	No entry	Presence	Target	Guam	2020-03-30	2020-06-29	92	2020-04-01	2020-03-31	32	1			1
Morocco	No entry	Presence	Target	Guatemala	2020-03-30	2020-06-29	92	2020-04-01	2020-03-31	32	1			1
Morocco	No entry	Presence	Target	Guinea	2020-03-30	2020-06-29	92	2020-04-01	2020-03-31	32	1			1
Morocco	No entry	Presence	Target	Guinea-Bissau	2020-03-30	2020-06-29	92	2020-04-01	2020-03-31	32	1			1
Morocco	No entry	Presence	Target	Guyana	2020-03-30	2020-06-29	92	2020-04-01	2020-03-31	32	1			1
Morocco	No entry	Presence	Target	Haiti	2020-03-30	2020-06-29	92	2020-04-01	2020-03-31	32	1			1
Morocco	No entry	Presence	Target	Honduras	2020-03-30	2020-06-29	92	2020-04-01	2020-03-31	32	1			1
Morocco	No entry	Presence	Target	Hong Kong	2020-03-30	2020-06-29	92	2020-04-01	2020-03-31	32	1			1
Morocco	No entry	Presence	Target	Hungary	2020-03-30	2020-06-29	92	2020-04-01	2020-03-31	32	1			1
Morocco	No entry	Presence	Target	Iceland	2020-03-30	2020-06-29	92	2020-04-01	2020-03-31	32	1			1
Morocco	No entry	Presence	Target	India	2020-03-30	2020-06-29	92	2020-04-01	2020-03-31	32	1			1
Morocco	No entry	Presence	Target	Indonesia	2020-03-30	2020-06-29	92	2020-04-01	2020-03-31	32	1			1
Morocco	No entry	Presence	Target	Iran	2020-03-30	2020-06-29	92	2020-04-01	2020-03-31	32	1			1
Morocco	No entry	Presence	Target	Iraq	2020-03-30	2020-06-29	92	2020-04-01	2020-03-31	32	1			1
Morocco	No entry	Presence	Target	Ireland	2020-03-30	2020-06-29	92	2020-04-01	2020-03-31	32	1			1
Morocco	No entry	Presence	Target	Israel	2020-03-30	2020-06-29	92	2020-04-01	2020-03-31	32	1			1
Morocco	No entry	Presence	Target	Italy	2020-03-30	2020-06-29	92	2020-04-01	2020-03-31	32	1			1
Morocco	No entry	Presence	Target	Jamaica	2020-03-30	2020-06-29	92	2020-04-01	2020-03-31	32	1			1
Morocco	No entry	Presence	Target	Japan	2020-03-30	2020-06-29	92	2020-04-01	2020-03-31	32	1			1
Morocco	No entry	Presence	Target	Jordan	2020-03-30	2020-06-29	92	2020-04-01	2020-03-31	32	1			1
Morocco	No entry	Presence	Target	Kazakhstan	2020-03-30	2020-06-29	92	2020-04-01	2020-03-31	32	1			1
Morocco	No entry	Presence	Target	Kenya	2020-03-30	2020-06-29	92	2020-04-01	2020-03-31	32	1			1
Morocco	No entry	Presence	Target	Kosovo	2020-03-30	2020-06-29	92	2020-04-01	2020-03-31	32	1			1
Morocco	No entry	Presence	Target	Kuwait	2020-03-30	2020-06-29	92	2020-04-01	2020-03-31	32	1			1
Morocco	No entry	Presence	Target	Kyrgyzstan	2020-03-30	2020-06-29	92	2020-04-01	2020-03-31	32	1			1
Morocco	No entry	Presence	Target	Laos	2020-03-30	2020-06-29	92	2020-04-01	2020-03-31	32	1			1
Morocco	No entry	Presence	Target	Latvia	2020-03-30	2020-06-29	92	2020-04-01	2020-03-31	32	1			1
Morocco	No entry	Presence	Target	Lebanon	2020-03-30	2020-06-29	92	2020-04-01	2020-03-31	32	1			1
Morocco	No entry	Presence	Target	Lesotho	2020-03-30	2020-06-29	92	2020-04-01	2020-03-31	32	1			1
Morocco	No entry	Presence	Target	Liberia	2020-03-30	2020-06-29	92	2020-04-01	2020-03-31	32	1			1
Morocco	No entry	Presence	Target	Libya	2020-03-30	2020-06-29	92	2020-04-01	2020-03-31	32	1			1
Morocco	No entry	Presence	Target	Liechtenstein	2020-03-30	2020-06-29	92	2020-04-01	2020-03-31	32	1			1
Morocco	No entry	Presence	Target	Lithuania	2020-03-30	2020-06-29	92	2020-04-01	2020-03-31	32	1			1
Morocco	No entry	Presence	Target	Luxembourg	2020-03-30	2020-06-29	92	2020-04-01	2020-03-31	32	1			1
Morocco	No entry	Presence	Target	Macao	2020-03-30	2020-06-29	92	2020-04-01	2020-03-31	32	1			1
Morocco	No entry	Presence	Target	Macedonia	2020-03-30	2020-06-29	92	2020-04-01	2020-03-31	32	1			1
Morocco	No entry	Presence	Target	Madagascar	2020-03-30	2020-06-29	92	2020-04-01	2020-03-31	32	1			1
Morocco	No entry	Presence	Target	Malawi	2020-03-30	2020-06-29	92	2020-04-01	2020-03-31	32	1			1
Morocco	No entry	Presence	Target	Malaysia	2020-03-30	2020-06-29	92	2020-04-01	2020-03-31	32	1			1
Morocco	No entry	Presence	Target	Maldives	2020-03-30	2020-06-29	92	2020-04-01	2020-03-31	32	1			1
Morocco	No entry	Presence	Target	Mali	2020-03-30	2020-06-29	92	2020-04-01	2020-03-31	32	1			1
Morocco	No entry	Presence	Target	Malta	2020-03-30	2020-06-29	92	2020-04-01	2020-03-31	32	1			1
Morocco	No entry	Presence	Target	Mauritania	2020-03-30	2020-06-29	92	2020-04-01	2020-03-31	32	1			1
Morocco	No entry	Presence	Target	Mauritius	2020-03-30	2020-06-29	92	2020-04-01	2020-03-31	32	1			1
Morocco	No entry	Presence	Target	Mexico	2020-03-30	2020-06-29	92	2020-04-01	2020-03-31	32	1			1
Morocco	No entry	Presence	Target	Micronesia	2020-03-30	2020-06-29	92	2020-04-01	2020-03-31	32	1			1
Morocco	No entry	Presence	Target	Moldova	2020-03-30	2020-06-29	92	2020-04-01	2020-03-31	32	1			1
Morocco	No entry	Presence	Target	Monaco	2020-03-30	2020-06-29	92	2020-04-01	2020-03-31	32	1			1
Morocco	No entry	Presence	Target	Mongolia	2020-03-30	2020-06-29	92	2020-04-01	2020-03-31	32	1			1
Morocco	No entry	Presence	Target	Montenegro	2020-03-30	2020-06-29	92	2020-04-01	2020-03-31	32	1			1
Morocco	No entry	Presence	Target	Montserrat	2020-03-30	2020-06-29	92	2020-04-01	2020-03-31	32	1			1
Morocco	No entry	Presence	Target	Morocco	2020-03-30	2020-06-29	92	2020-04-01	2020-03-31	32	1			1
Morocco	No entry	Presence	Target	Mozambique	2020-03-30	2020-06-29	92	2020-04-01	2020-03-31	32	1			1
Morocco	No entry	Presence	Target	Myanmar	2020-03-30	2020-06-29	92	2020-04-01	2020-03-31	32	1			1
Morocco	No entry	Presence	Target	Namibia	2020-03-30	2020-06-29	92	2020-04-01	2020-03-31	32	1			1
Morocco	No entry	Presence	Target	Nauru	2020-03-30	2020-06-29	92	2020-04-01	2020-03-31	32	1			1
Morocco	No entry	Presence	Target	Nepal	2020-03-30	2020-06-29	92	2020-04-01	2020-03-31	32	1			1
Morocco	No entry	Presence	Target	Netherlands	2020-03-30	2020-06-29	92	2020-04-01	2020-03-31	32	1			1
Morocco	No entry	Presence	Target	New Caledonia	2020-03-30	2020-06-29	92	2020-04-01	2020-03-31	32	1			1
Morocco	No entry	Presence	Target	New Zealand	2020-03-30	2020-06-29	92	2020-04-01	2020-03-31	32	1			1
Morocco	No entry	Presence	Target	Nicaragua	2020-03-30	2020-06-29	92	2020-04-01	2020-03-31	32	1			1
Morocco	No entry	Presence	Target	Niger	2020-03-30	2020-06-29	92	2020-04-01	2020-03-31	32	1			1
Morocco	No entry	Presence	Target	Nigeria	2020-03-30	2020-06-29	92	2020-04-01	2020-03-31	32	1			1
Morocco	No entry	Presence	Target	North Korea	2020-03-30	2020-06-29	92	2020-04-01	2020-03-31	32	1			1
Morocco	No entry	Presence	Target	Norway	2020-03-30	2020-06-29	92	2020-04-01	2020-03-31	32	1			1
Morocco	No entry	Presence	Target	Oman	2020-03-30	2020-06-29	92	2020-04-01	2020-03-31	32	1			1
Morocco	No entry	Presence	Target	Pakistan	2020-03-30	2020-06-29	92	2020-04-01	2020-03-31	32	1			1
Morocco	No entry	Presence	Target	Palau	2020-03-30	2020-06-29	92	2020-04-01	2020-03-31	32	1			1
Morocco	No entry	Presence	Target	Palestine	2020-03-30	2020-06-29	92	2020-04-01	2020-03-31	32	1			1
Morocco	No entry	Presence	Target	Panama	2020-03-30	2020-06-29	92	2020-04-01	2020-03-31	32	1			1
Morocco	No entry	Presence	Target	Papua New Guinea	2020-03-30	2020-06-29	92	2020-04-01	2020-03-31	32	1			1
Morocco	No entry	Presence	Target	Paraguay	2020-03-30	2020-06-29	92	2020-04-01	2020-03-31	32	1			1
Morocco	No entry	Presence	Target	Peru	2020-03-30	2020-06-29	92	2020-04-01	2020-03-31	32	1			1
Morocco	No entry	Presence	Target	Philippines	2020-03-30	2020-06-29	92	2020-04-01	2020-03-31	32	1			1
Morocco	No entry	Presence	Target	Poland	2020-03-30	2020-06-29	92	2020-04-01	2020-03-31	32	1			1
Morocco	No entry	Presence	Target	Portugal	2020-03-30	2020-06-29	92	2020-04-01	2020-03-31	32	1			1
Morocco	No entry	Presence	Target	Qatar	2020-03-30	2020-06-29	92	2020-04-01	2020-03-31	32	1			1
Morocco	No entry	Presence	Target	Romania	2020-03-30	2020-06-29	92	2020-04-01	2020-03-31	32	1			1
Morocco	No entry	Presence	Target	Russia	2020-03-30	2020-06-29	92	2020-04-01	2020-03-31	32	1			1
Morocco	No entry	Presence	Target	Rwanda	2020-03-30	2020-06-29	92	2020-04-01	2020-03-31	32	1			1
Morocco	No entry	Presence	Target	Saint Kitts and Nevis	2020-03-30	2020-06-29	92	2020-04-01	2020-03-31	32	1			1
Morocco	No entry	Presence	Target	Saint Lucia	2020-03-30	2020-06-29	92	2020-04-01	2020-03-31	32	1			1
Morocco	No entry	Presence	Target	Saint Pierre and Miquelon	2020-03-30	2020-06-29	92	2020-04-01	2020-03-31	32	1			1
Morocco	No entry	Presence	Target	Saint Vincent and the Grenadines	2020-03-30	2020-06-29	92	2020-04-01	2020-03-31	32	1			1
Morocco	No entry	Presence	Target	Samoa	2020-03-30	2020-06-29	92	2020-04-01	2020-03-31	32	1			1
Morocco	No entry	Presence	Target	San Marino	2020-03-30	2020-06-29	92	2020-04-01	2020-03-31	32	1			1
Morocco	No entry	Presence	Target	São Tomé and Príncipe	2020-03-30	2020-06-29	92	2020-04-01	2020-03-31	32	1			1
Morocco	No entry	Presence	Target	Saudi Arabia	2020-03-30	2020-06-29	92	2020-04-01	2020-03-31	32	1			1
Morocco	No entry	Presence	Target	Senegal	2020-03-30	2020-06-29	92	2020-04-01	2020-03-31	32	1			1
Morocco	No entry	Presence	Target	Serbia	2020-03-30	2020-06-29	184	2020-04-01	2020-03-31	32	1			1
Morocco	No entry	Presence	Target	Seychelles	2020-03-30	2020-06-29	92	2020-04-01	2020-03-31	32	1			1
Morocco	No entry	Presence	Target	Sierra Leone	2020-03-30	2020-06-29	92	2020-04-01	2020-03-31	32	1			1
Morocco	No entry	Presence	Target	Singapore	2020-03-30	2020-06-29	92	2020-04-01	2020-03-31	32	1			1
Morocco	No entry	Presence	Target	Slovakia	2020-03-30	2020-06-29	92	2020-04-01	2020-03-31	32	1			1
Morocco	No entry	Presence	Target	Slovenia	2020-03-30	2020-06-29	92	2020-04-01	2020-03-31	32	1			1
Morocco	No entry	Presence	Target	Solomon Islands	2020-03-30	2020-06-29	92	2020-04-01	2020-03-31	32	1			1
Morocco	No entry	Presence	Target	Somalia	2020-03-30	2020-06-29	92	2020-04-01	2020-03-31	32	1			1
Morocco	No entry	Presence	Target	South Africa	2020-03-30	2020-06-29	92	2020-04-01	2020-03-31	32	1			1
Morocco	No entry	Presence	Target	South Korea	2020-03-30	2020-06-29	92	2020-04-01	2020-03-31	32	1			1
Morocco	No entry	Presence	Target	South Sudan	2020-03-30	2020-06-29	92	2020-04-01	2020-03-31	32	1			1
Morocco	No entry	Presence	Target	Spain	2020-03-30	2020-06-29	184	2020-04-01	2020-03-31	32	1			1
Morocco	No entry	Presence	Target	Sri Lanka	2020-03-30	2020-06-29	92	2020-04-01	2020-03-31	32	1			1
Morocco	No entry	Presence	Target	Sudan	2020-03-30	2020-06-29	92	2020-04-01	2020-03-31	32	1			1
Morocco	No entry	Presence	Target	Suriname	2020-03-30	2020-06-29	92	2020-04-01	2020-03-31	32	1			1
Morocco	No entry	Presence	Target	Svalbard and Jan Mayen	2020-03-30	2020-06-29	92	2020-04-01	2020-03-31	32	1			1
Morocco	No entry	Presence	Target	Swaziland	2020-03-30	2020-06-29	92	2020-04-01	2020-03-31	32	1			1
Morocco	No entry	Presence	Target	Sweden	2020-03-30	2020-06-29	92	2020-04-01	2020-03-31	32	1			1
Morocco	No entry	Presence	Target	Switzerland	2020-03-30	2020-06-29	92	2020-04-01	2020-03-31	32	1			1
Morocco	No entry	Presence	Target	Syria	2020-03-30	2020-06-29	92	2020-04-01	2020-03-31	32	1			1
Morocco	No entry	Presence	Target	Taiwan	2020-03-30	2020-06-29	92	2020-04-01	2020-03-31	32	1			1
Morocco	No entry	Presence	Target	Tajikistan	2020-03-30	2020-06-29	92	2020-04-01	2020-03-31	32	1			1
Morocco	No entry	Presence	Target	Tanzania	2020-03-30	2020-06-29	92	2020-04-01	2020-03-31	32	1			1
Morocco	No entry	Presence	Target	Thailand	2020-03-30	2020-06-29	92	2020-04-01	2020-03-31	32	1			1
Morocco	No entry	Presence	Target	Timor-Leste	2020-03-30	2020-06-29	92	2020-04-01	2020-03-31	32	1			1
Morocco	No entry	Presence	Target	Togo	2020-03-30	2020-06-29	92	2020-04-01	2020-03-31	32	1			1
Morocco	No entry	Presence	Target	Tonga	2020-03-30	2020-06-29	92	2020-04-01	2020-03-31	32	1			1
Morocco	No entry	Presence	Target	Trinidad and Tobago	2020-03-30	2020-06-29	92	2020-04-01	2020-03-31	32	1			1
Morocco	No entry	Presence	Target	Tunisia	2020-03-30	2020-06-29	92	2020-04-01	2020-03-31	32	1			1
Morocco	No entry	Presence	Target	Turkey	2020-03-30	2020-06-29	92	2020-04-01	2020-03-31	32	1			1
Morocco	No entry	Presence	Target	Turkmenistan	2020-03-30	2020-06-29	92	2020-04-01	2020-03-31	32	1			1
Morocco	No entry	Presence	Target	Tuvalu	2020-03-30	2020-06-29	92	2020-04-01	2020-03-31	32	1			1
Morocco	No entry	Presence	Target	Uganda	2020-03-30	2020-06-29	92	2020-04-01	2020-03-31	32	1			1
Morocco	No entry	Presence	Target	Ukraine	2020-03-30	2020-06-29	92	2020-04-01	2020-03-31	32	1			1
Morocco	No entry	Presence	Target	United Arab Emirates	2020-03-30	2020-06-29	92	2020-04-01	2020-03-31	32	1			1
Morocco	No entry	Presence	Target	United Kingdom	2020-03-30	2020-06-29	92	2020-04-01	2020-03-31	32	1			1
Morocco	No entry	Presence	Target	United States	2020-03-30	2020-06-29	184	2020-04-01	2020-03-31	32	1			1
Morocco	No entry	Presence	Target	Uruguay	2020-03-30	2020-06-29	92	2020-04-01	2020-03-31	32	1			1
Morocco	No entry	Presence	Target	Uzbekistan	2020-03-30	2020-06-29	92	2020-04-01	2020-03-31	32	1			1
Morocco	No entry	Presence	Target	Vanuatu	2020-03-30	2020-06-29	92	2020-04-01	2020-03-31	32	1			1
Morocco	No entry	Presence	Target	Vatican City	2020-03-30	2020-06-29	92	2020-04-01	2020-03-31	32	1			1
Morocco	No entry	Presence	Target	Venezuela	2020-03-30	2020-06-29	92	2020-04-01	2020-03-31	32	1			1
Morocco	No entry	Presence	Target	Vietnam	2020-03-30	2020-06-29	92	2020-04-01	2020-03-31	32	1			1
Morocco	No entry	Presence	Target	Western Sahara	2020-03-30	2020-06-29	92	2020-04-01	2020-03-31	32	1			1
Morocco	No entry	Presence	Target	Yemen	2020-03-30	2020-06-29	92	2020-04-01	2020-03-31	32	1			1
Morocco	No entry	Presence	Target	Zambia	2020-03-30	2020-06-29	92	2020-04-01	2020-03-31	32	1			1
Morocco	No entry	Presence	Target	Zimbabwe	2020-03-30	2020-06-29	92	2020-04-01	2020-03-31	32	1			1
Peru	No entry	Presence	Exception	Family of residents / nationals	2020-03-16	2020-06-29	106				0			1
Peru	No entry	Presence	Exception	Nationals	2020-03-16	2020-06-29	106				0			1
Peru	No entry	Presence	Exception	Other exception (specific)				2020-04-01	2020-03-31	40	0			1
Peru	No entry	Presence	Exception	Residents	2020-03-16	2020-06-29	106				0			1
Peru	No entry	Presence	Target	Afghanistan	2020-03-16	2020-06-29	106	2020-04-01	2020-03-31	46	1			1
Peru	No entry	Presence	Target	Albania	2020-03-16	2020-06-29	106	2020-04-01	2020-03-31	46	1			1
Peru	No entry	Presence	Target	Algeria	2020-03-16	2020-06-29	106	2020-04-01	2020-03-31	46	1			1
Peru	No entry	Presence	Target	Andorra	2020-03-16	2020-06-29	106	2020-04-01	2020-03-31	46	1			1
Peru	No entry	Presence	Target	Angola	2020-03-16	2020-06-29	106	2020-04-01	2020-03-31	46	1			1
Peru	No entry	Presence	Target	Antigua and Barbuda	2020-03-16	2020-06-29	106	2020-04-01	2020-03-31	46	1			1
Peru	No entry	Presence	Target	Argentina	2020-03-16	2020-06-29	106	2020-04-01	2020-03-31	46	1			1
Peru	No entry	Presence	Target	Armenia	2020-03-16	2020-06-29	106	2020-04-01	2020-03-31	46	1			1
Peru	No entry	Presence	Target	Australia	2020-03-16	2020-06-29	106	2020-04-01	2020-03-31	46	1			1
Peru	No entry	Presence	Target	Austria	2020-03-16	2020-06-29	106	2020-04-01	2020-03-31	46	1			1
Peru	No entry	Presence	Target	Azerbaijan	2020-03-16	2020-06-29	106	2020-04-01	2020-03-31	46	1			1
Peru	No entry	Presence	Target	Bahamas	2020-03-16	2020-06-29	106	2020-04-01	2020-03-31	46	1			1
Peru	No entry	Presence	Target	Bahrain	2020-03-16	2020-06-29	106	2020-04-01	2020-03-31	46	1			1
Peru	No entry	Presence	Target	Bangladesh	2020-03-16	2020-06-29	106	2020-04-01	2020-03-31	46	1			1
Peru	No entry	Presence	Target	Barbados	2020-03-16	2020-06-29	106	2020-04-01	2020-03-31	46	1			1
Peru	No entry	Presence	Target	Belarus	2020-03-16	2020-06-29	106	2020-04-01	2020-03-31	46	1			1
Peru	No entry	Presence	Target	Belgium	2020-03-16	2020-06-29	106	2020-04-01	2020-03-31	46	1			1
Peru	No entry	Presence	Target	Belize	2020-03-16	2020-06-29	106	2020-04-01	2020-03-31	46	1			1
Peru	No entry	Presence	Target	Benin	2020-03-16	2020-06-29	106	2020-04-01	2020-03-31	46	1			1
Peru	No entry	Presence	Target	Bermuda	2020-03-16	2020-06-29	106	2020-04-01	2020-03-31	46	1			1
Peru	No entry	Presence	Target	Bhutan	2020-03-16	2020-06-29	106	2020-04-01	2020-03-31	46	1			1
Peru	No entry	Presence	Target	Bolivia	2020-03-16	2020-06-29	106	2020-04-01	2020-03-31	46	1			1
Peru	No entry	Presence	Target	Bosnia and Herzegovina	2020-03-16	2020-06-29	106	2020-04-01	2020-03-31	46	1			1
Peru	No entry	Presence	Target	Botswana	2020-03-16	2020-06-29	106	2020-04-01	2020-03-31	46	1			1
Peru	No entry	Presence	Target	Brazil	2020-03-16	2020-06-29	106	2020-04-01	2020-03-31	46	1			1
Peru	No entry	Presence	Target	British Virgin Islands	2020-03-16	2020-06-29	106	2020-04-01	2020-03-31	46	1			1
Peru	No entry	Presence	Target	Brunei	2020-03-16	2020-06-29	106	2020-04-01	2020-03-31	46	1			1
Peru	No entry	Presence	Target	Bulgaria	2020-03-16	2020-06-29	106	2020-04-01	2020-03-31	46	1			1
Peru	No entry	Presence	Target	Burkina Faso	2020-03-16	2020-06-29	106	2020-04-01	2020-03-31	46	1			1
Peru	No entry	Presence	Target	Burundi	2020-03-16	2020-06-29	106	2020-04-01	2020-03-31	46	1			1
Peru	No entry	Presence	Target	Buthan				2020-04-01	2020-03-31	46	0			1
Peru	No entry	Presence	Target	Cambodia	2020-03-16	2020-06-29	106	2020-04-01	2020-03-31	46	1			1
Peru	No entry	Presence	Target	Cameroon	2020-03-16	2020-06-29	106	2020-04-01	2020-03-31	46	1			1
Peru	No entry	Presence	Target	Canada	2020-03-16	2020-06-29	106	2020-04-01	2020-03-31	46	1			1
Peru	No entry	Presence	Target	Cape Verde	2020-03-16	2020-06-29	106	2020-04-01	2020-03-31	46	1			1
Peru	No entry	Presence	Target	Cayman Islands	2020-03-16	2020-06-29	106	2020-04-01	2020-03-31	46	1			1
Peru	No entry	Presence	Target	Central African Republic	2020-03-16	2020-06-29	106	2020-04-01	2020-03-31	46	1			1
Peru	No entry	Presence	Target	Chad	2020-03-16	2020-06-29	106	2020-04-01	2020-03-31	46	1			1
Peru	No entry	Presence	Target	Chile	2020-03-16	2020-06-29	106	2020-04-01	2020-03-31	46	1			1
Peru	No entry	Presence	Target	China	2020-03-16	2020-06-29	106	2020-04-01	2020-03-31	46	1			1
Peru	No entry	Presence	Target	Colombia	2020-03-16	2020-06-29	106	2020-04-01	2020-03-31	46	1			1
Peru	No entry	Presence	Target	Comoros	2020-03-16	2020-06-29	106	2020-04-01	2020-03-31	46	1			1
Peru	No entry	Presence	Target	Congo (Brazzaville)	2020-03-16	2020-06-29	106	2020-04-01	2020-03-31	46	1			1
Peru	No entry	Presence	Target	Congo (Kinshasa)	2020-03-16	2020-06-29	106	2020-04-01	2020-03-31	46	1			1
Peru	No entry	Presence	Target	Costa Rica	2020-03-16	2020-06-29	106	2020-04-01	2020-03-31	46	1			1
Peru	No entry	Presence	Target	Côte d'Ivoire	2020-03-16	2020-06-29	106	2020-04-01	2020-03-31	46	1			1
Peru	No entry	Presence	Target	Croatia	2020-03-16	2020-06-29	106	2020-04-01	2020-03-31	46	1			1
Peru	No entry	Presence	Target	Cuba	2020-03-16	2020-06-29	106	2020-04-01	2020-03-31	46	1			1
Peru	No entry	Presence	Target	Curaçao	2020-03-16	2020-06-29	106	2020-04-01	2020-03-31	46	1			1
Peru	No entry	Presence	Target	Cyprus	2020-03-16	2020-06-29	106	2020-04-01	2020-03-31	46	1			1
Peru	No entry	Presence	Target	Czech Republic	2020-03-16	2020-06-29	212	2020-04-01	2020-03-31	46	1			1
Peru	No entry	Presence	Target	Denmark	2020-03-16	2020-06-29	106	2020-04-01	2020-03-31	46	1			1
Peru	No entry	Presence	Target	Djibouti	2020-03-16	2020-06-29	106	2020-04-01	2020-03-31	46	1			1
Peru	No entry	Presence	Target	Dominica	2020-03-16	2020-06-29	106	2020-04-01	2020-03-31	46	1			1
Peru	No entry	Presence	Target	Dominican Republic	2020-03-16	2020-06-29	106	2020-04-01	2020-03-31	46	1			1
Peru	No entry	Presence	Target	Ecuador	2020-03-16	2020-06-29	106	2020-04-01	2020-03-31	46	1			1
Peru	No entry	Presence	Target	Egypt	2020-03-16	2020-06-29	106	2020-04-01	2020-03-31	46	1			1
Peru	No entry	Presence	Target	El Salvador	2020-03-16	2020-06-29	106	2020-04-01	2020-03-31	46	1			1
Peru	No entry	Presence	Target	Equatorial Guinea	2020-03-16	2020-06-29	106	2020-04-01	2020-03-31	46	1			1
Peru	No entry	Presence	Target	Eritrea	2020-03-16	2020-06-29	106	2020-04-01	2020-03-31	46	1			1
Peru	No entry	Presence	Target	Estonia	2020-03-16	2020-06-29	106	2020-04-01	2020-03-31	46	1			1
Peru	No entry	Presence	Target	Ethiopia	2020-03-16	2020-06-29	106	2020-04-01	2020-03-31	46	1			1
Peru	No entry	Presence	Target	Faeroe Islands	2020-03-16	2020-06-29	106	2020-04-01	2020-03-31	46	1			1
Peru	No entry	Presence	Target	Falkland Islands	2020-03-16	2020-06-29	106	2020-04-01	2020-03-31	46	1			1
Peru	No entry	Presence	Target	Fiji	2020-03-16	2020-06-29	106	2020-04-01	2020-03-31	46	1			1
Peru	No entry	Presence	Target	Finland	2020-03-16	2020-06-29	106	2020-04-01	2020-03-31	46	1			1
Peru	No entry	Presence	Target	France	2020-03-16	2020-06-29	106	2020-04-01	2020-03-31	46	1			1
Peru	No entry	Presence	Target	Gabon	2020-03-16	2020-06-29	106	2020-04-01	2020-03-31	46	1			1
Peru	No entry	Presence	Target	Gambia	2020-03-16	2020-06-29	106	2020-04-01	2020-03-31	46	1			1
Peru	No entry	Presence	Target	Georgia	2020-03-16	2020-06-29	106	2020-04-01	2020-03-31	46	1			1
Peru	No entry	Presence	Target	Germany	2020-03-16	2020-06-29	106	2020-04-01	2020-03-31	46	1			1
Peru	No entry	Presence	Target	Ghana	2020-03-16	2020-06-29	106	2020-04-01	2020-03-31	46	1			1
Peru	No entry	Presence	Target	Gibraltar	2020-03-16	2020-06-29	106	2020-04-01	2020-03-31	46	1			1
Peru	No entry	Presence	Target	Greece	2020-03-16	2020-06-29	106	2020-04-01	2020-03-31	46	1			1
Peru	No entry	Presence	Target	Grenada	2020-03-16	2020-06-29	106	2020-04-01	2020-03-31	46	1			1
Peru	No entry	Presence	Target	Guadeloupe	2020-03-16	2020-06-29	106	2020-04-01	2020-03-31	46	1			1
Peru	No entry	Presence	Target	Guam	2020-03-16	2020-06-29	106	2020-04-01	2020-03-31	46	1			1
Peru	No entry	Presence	Target	Guatemala	2020-03-16	2020-06-29	106	2020-04-01	2020-03-31	46	1			1
Peru	No entry	Presence	Target	Guinea	2020-03-16	2020-06-29	106	2020-04-01	2020-03-31	46	1			1
Peru	No entry	Presence	Target	Guinea-Bissau	2020-03-16	2020-06-29	106	2020-04-01	2020-03-31	46	1			1
Peru	No entry	Presence	Target	Guyana	2020-03-16	2020-06-29	106	2020-04-01	2020-03-31	46	1			1
Peru	No entry	Presence	Target	Haiti	2020-03-16	2020-06-29	106	2020-04-01	2020-03-31	46	1			1
Peru	No entry	Presence	Target	Honduras	2020-03-16	2020-06-29	106	2020-04-01	2020-03-31	46	1			1
Peru	No entry	Presence	Target	Hong Kong	2020-03-16	2020-06-29	106	2020-04-01	2020-03-31	46	1			1
Peru	No entry	Presence	Target	Hungary	2020-03-16	2020-06-29	106	2020-04-01	2020-03-31	46	1			1
Peru	No entry	Presence	Target	Iceland	2020-03-16	2020-06-29	106	2020-04-01	2020-03-31	46	1			1
Peru	No entry	Presence	Target	India	2020-03-16	2020-06-29	106	2020-04-01	2020-03-31	46	1			1
Peru	No entry	Presence	Target	Indonesia	2020-03-16	2020-06-29	106	2020-04-01	2020-03-31	46	1			1
Peru	No entry	Presence	Target	Iran	2020-03-16	2020-06-29	106	2020-04-01	2020-03-31	46	1			1
Peru	No entry	Presence	Target	Iraq	2020-03-16	2020-06-29	106	2020-04-01	2020-03-31	46	1			1
Peru	No entry	Presence	Target	Ireland	2020-03-16	2020-06-29	106	2020-04-01	2020-03-31	46	1			1
Peru	No entry	Presence	Target	Israel	2020-03-16	2020-06-29	106	2020-04-01	2020-03-31	46	1			1
Peru	No entry	Presence	Target	Italy	2020-03-16	2020-06-29	106	2020-04-01	2020-03-31	46	1			1
Peru	No entry	Presence	Target	Jamaica	2020-03-16	2020-06-29	106	2020-04-01	2020-03-31	46	1			1
Peru	No entry	Presence	Target	Japan	2020-03-16	2020-06-29	106	2020-04-01	2020-03-31	46	1			1
Peru	No entry	Presence	Target	Jordan	2020-03-16	2020-06-29	106	2020-04-01	2020-03-31	46	1			1
Peru	No entry	Presence	Target	Kazakhstan	2020-03-16	2020-06-29	106	2020-04-01	2020-03-31	46	1			1
Peru	No entry	Presence	Target	Kenya	2020-03-16	2020-06-29	106	2020-04-01	2020-03-31	46	1			1
Peru	No entry	Presence	Target	Kosovo	2020-03-16	2020-06-29	106	2020-04-01	2020-03-31	46	1			1
Peru	No entry	Presence	Target	Kuwait	2020-03-16	2020-06-29	106	2020-04-01	2020-03-31	46	1			1
Peru	No entry	Presence	Target	Kyrgyzstan	2020-03-16	2020-06-29	106	2020-04-01	2020-03-31	46	1			1
Peru	No entry	Presence	Target	Laos	2020-03-16	2020-06-29	106	2020-04-01	2020-03-31	46	1			1
Peru	No entry	Presence	Target	Latvia	2020-03-16	2020-06-29	106	2020-04-01	2020-03-31	46	1			1
Peru	No entry	Presence	Target	Lebanon	2020-03-16	2020-06-29	106	2020-04-01	2020-03-31	46	1			1
Peru	No entry	Presence	Target	Lesotho	2020-03-16	2020-06-29	106	2020-04-01	2020-03-31	46	1			1
Peru	No entry	Presence	Target	Liberia	2020-03-16	2020-06-29	106	2020-04-01	2020-03-31	46	1			1
Peru	No entry	Presence	Target	Libya	2020-03-16	2020-06-29	106	2020-04-01	2020-03-31	46	1			1
Peru	No entry	Presence	Target	Liechtenstein	2020-03-16	2020-06-29	106	2020-04-01	2020-03-31	46	1			1
Peru	No entry	Presence	Target	Lithuania	2020-03-16	2020-06-29	106	2020-04-01	2020-03-31	46	1			1
Peru	No entry	Presence	Target	Luxembourg	2020-03-16	2020-06-29	106	2020-04-01	2020-03-31	46	1			1
Peru	No entry	Presence	Target	Macao	2020-03-16	2020-06-29	106	2020-04-01	2020-03-31	46	1			1
Peru	No entry	Presence	Target	Macedonia	2020-03-16	2020-06-29	106	2020-04-01	2020-03-31	46	1			1
Peru	No entry	Presence	Target	Madagascar	2020-03-16	2020-06-29	106	2020-04-01	2020-03-31	46	1			1
Peru	No entry	Presence	Target	Malawi	2020-03-16	2020-06-29	106	2020-04-01	2020-03-31	46	1			1
Peru	No entry	Presence	Target	Malaysia	2020-03-16	2020-06-29	106	2020-04-01	2020-03-31	46	1			1
Peru	No entry	Presence	Target	Maldives	2020-03-16	2020-06-29	106	2020-04-01	2020-03-31	46	1			1
Peru	No entry	Presence	Target	Mali	2020-03-16	2020-06-29	106	2020-04-01	2020-03-31	46	1			1
Peru	No entry	Presence	Target	Malta	2020-03-16	2020-06-29	106	2020-04-01	2020-03-31	46	1			1
Peru	No entry	Presence	Target	Mauritania	2020-03-16	2020-06-29	106	2020-04-01	2020-03-31	46	1			1
Peru	No entry	Presence	Target	Mauritius	2020-03-16	2020-06-29	106	2020-04-01	2020-03-31	46	1			1
Peru	No entry	Presence	Target	Mexico	2020-03-16	2020-06-29	106	2020-04-01	2020-03-31	46	1			1
Peru	No entry	Presence	Target	Micronesia	2020-03-16	2020-06-29	106	2020-04-01	2020-03-31	46	1			1
Peru	No entry	Presence	Target	Moldova	2020-03-16	2020-06-29	106	2020-04-01	2020-03-31	46	1			1
Peru	No entry	Presence	Target	Monaco	2020-03-16	2020-06-29	106	2020-04-01	2020-03-31	46	1			1
Peru	No entry	Presence	Target	Mongolia	2020-03-16	2020-06-29	106	2020-04-01	2020-03-31	46	1			1
Peru	No entry	Presence	Target	Montenegro	2020-03-16	2020-06-29	106	2020-04-01	2020-03-31	46	1			1
Peru	No entry	Presence	Target	Montserrat	2020-03-16	2020-06-29	106	2020-04-01	2020-03-31	46	1			1
Peru	No entry	Presence	Target	Morocco	2020-03-16	2020-06-29	106	2020-04-01	2020-03-31	46	1			1
Peru	No entry	Presence	Target	Mozambique	2020-03-16	2020-06-29	106	2020-04-01	2020-03-31	46	1			1
Peru	No entry	Presence	Target	Myanmar	2020-03-16	2020-06-29	106	2020-04-01	2020-03-31	46	1			1
Peru	No entry	Presence	Target	Namibia	2020-03-16	2020-06-29	106	2020-04-01	2020-03-31	46	1			1
Peru	No entry	Presence	Target	Nauru	2020-03-16	2020-06-29	106	2020-04-01	2020-03-31	46	1			1
Peru	No entry	Presence	Target	Nepal	2020-03-16	2020-06-29	106	2020-04-01	2020-03-31	46	1			1
Peru	No entry	Presence	Target	Netherlands	2020-03-16	2020-06-29	106	2020-04-01	2020-03-31	46	1			1
Peru	No entry	Presence	Target	New Caledonia	2020-03-16	2020-06-29	106	2020-04-01	2020-03-31	46	1			1
Peru	No entry	Presence	Target	New Zealand	2020-03-16	2020-06-29	106	2020-04-01	2020-03-31	46	1			1
Peru	No entry	Presence	Target	Nicaragua	2020-03-16	2020-06-29	106	2020-04-01	2020-03-31	46	1			1
Peru	No entry	Presence	Target	Niger	2020-03-16	2020-06-29	106	2020-04-01	2020-03-31	46	1			1
Peru	No entry	Presence	Target	Nigeria	2020-03-16	2020-06-29	106	2020-04-01	2020-03-31	46	1			1
Peru	No entry	Presence	Target	North Korea	2020-03-16	2020-06-29	106	2020-04-01	2020-03-31	46	1			1
Peru	No entry	Presence	Target	Norway	2020-03-16	2020-06-29	106	2020-04-01	2020-03-31	46	1			1
Peru	No entry	Presence	Target	Oman	2020-03-16	2020-06-29	106	2020-04-01	2020-03-31	46	1			1
Peru	No entry	Presence	Target	Pakistan	2020-03-16	2020-06-29	106	2020-04-01	2020-03-31	46	1			1
Peru	No entry	Presence	Target	Palau	2020-03-16	2020-06-29	106	2020-04-01	2020-03-31	46	1			1
Peru	No entry	Presence	Target	Palestine	2020-03-16	2020-06-29	106	2020-04-01	2020-03-31	46	1			1
Peru	No entry	Presence	Target	Panama	2020-03-16	2020-06-29	106	2020-04-01	2020-03-31	46	1			1
Peru	No entry	Presence	Target	Papua New Guinea	2020-03-16	2020-06-29	106	2020-04-01	2020-03-31	46	1			1
Peru	No entry	Presence	Target	Paraguay	2020-03-16	2020-06-29	106	2020-04-01	2020-03-31	46	1			1
Peru	No entry	Presence	Target	Peru	2020-03-16	2020-06-29	106	2020-04-01	2020-03-31	46	1			1
Peru	No entry	Presence	Target	Philippines	2020-03-16	2020-06-29	106	2020-04-01	2020-03-31	46	1			1
Peru	No entry	Presence	Target	Poland	2020-03-16	2020-06-29	106	2020-04-01	2020-03-31	46	1			1
Peru	No entry	Presence	Target	Portugal	2020-03-16	2020-06-29	106	2020-04-01	2020-03-31	46	1			1
Peru	No entry	Presence	Target	Qatar	2020-03-16	2020-06-29	106	2020-04-01	2020-03-31	46	1			1
Peru	No entry	Presence	Target	Romania	2020-03-16	2020-06-29	106	2020-04-01	2020-03-31	46	1			1
Peru	No entry	Presence	Target	Russia	2020-03-16	2020-06-29	106	2020-04-01	2020-03-31	46	1			1
Peru	No entry	Presence	Target	Rwanda	2020-03-16	2020-06-29	106	2020-04-01	2020-03-31	46	1			1
Peru	No entry	Presence	Target	Saint Kitts and Nevis	2020-03-16	2020-06-29	106	2020-04-01	2020-03-31	46	1			1
Peru	No entry	Presence	Target	Saint Lucia	2020-03-16	2020-06-29	106	2020-04-01	2020-03-31	46	1			1
Peru	No entry	Presence	Target	Saint Pierre and Miquelon	2020-03-16	2020-06-29	106	2020-04-01	2020-03-31	46	1			1
Peru	No entry	Presence	Target	Saint Vincent and the Grenadines	2020-03-16	2020-06-29	106	2020-04-01	2020-03-31	46	1			1
Peru	No entry	Presence	Target	Samoa	2020-03-16	2020-06-29	106	2020-04-01	2020-03-31	46	1			1
Peru	No entry	Presence	Target	San Marino	2020-03-16	2020-06-29	106	2020-04-01	2020-03-31	46	1			1
Peru	No entry	Presence	Target	São Tomé and Príncipe	2020-03-16	2020-06-29	106	2020-04-01	2020-03-31	46	1			1
Peru	No entry	Presence	Target	Saudi Arabia	2020-03-16	2020-06-29	106	2020-04-01	2020-03-31	46	1			1
Peru	No entry	Presence	Target	Senegal	2020-03-16	2020-06-29	106	2020-04-01	2020-03-31	46	1			1
Peru	No entry	Presence	Target	Serbia	2020-03-16	2020-06-29	212	2020-04-01	2020-03-31	46	1			1
Peru	No entry	Presence	Target	Seychelles	2020-03-16	2020-06-29	106	2020-04-01	2020-03-31	46	1			1
Peru	No entry	Presence	Target	Sierra Leone	2020-03-16	2020-06-29	106	2020-04-01	2020-03-31	46	1			1
Peru	No entry	Presence	Target	Singapore	2020-03-16	2020-06-29	106	2020-04-01	2020-03-31	46	1			1
Peru	No entry	Presence	Target	Slovakia	2020-03-16	2020-06-29	106	2020-04-01	2020-03-31	46	1			1
Peru	No entry	Presence	Target	Slovenia	2020-03-16	2020-06-29	106	2020-04-01	2020-03-31	46	1			1
Peru	No entry	Presence	Target	Solomon Islands	2020-03-16	2020-06-29	106	2020-04-01	2020-03-31	46	1			1
Peru	No entry	Presence	Target	Somalia	2020-03-16	2020-06-29	106	2020-04-01	2020-03-31	46	1			1
Peru	No entry	Presence	Target	South Africa	2020-03-16	2020-06-29	106	2020-04-01	2020-03-31	46	1			1
Peru	No entry	Presence	Target	South Korea	2020-03-16	2020-06-29	106	2020-04-01	2020-03-31	46	1			1
Peru	No entry	Presence	Target	South Sudan	2020-03-16	2020-06-29	106	2020-04-01	2020-03-31	46	1			1
Peru	No entry	Presence	Target	Spain	2020-03-16	2020-06-29	212	2020-04-01	2020-03-31	46	1			1
Peru	No entry	Presence	Target	Sri Lanka	2020-03-16	2020-06-29	106	2020-04-01	2020-03-31	46	1			1
Peru	No entry	Presence	Target	Sudan	2020-03-16	2020-06-29	106	2020-04-01	2020-03-31	46	1			1
Peru	No entry	Presence	Target	Suriname	2020-03-16	2020-06-29	106	2020-04-01	2020-03-31	46	1			1
Peru	No entry	Presence	Target	Svalbard and Jan Mayen	2020-03-16	2020-06-29	106	2020-04-01	2020-03-31	46	1			1
Peru	No entry	Presence	Target	Swaziland	2020-03-16	2020-06-29	106	2020-04-01	2020-03-31	46	1			1
Peru	No entry	Presence	Target	Sweden	2020-03-16	2020-06-29	106	2020-04-01	2020-03-31	46	1			1
Peru	No entry	Presence	Target	Switzerland	2020-03-16	2020-06-29	106	2020-04-01	2020-03-31	46	1			1
Peru	No entry	Presence	Target	Syria	2020-03-16	2020-06-29	106	2020-04-01	2020-03-31	46	1			1
Peru	No entry	Presence	Target	Taiwan	2020-03-16	2020-06-29	106	2020-04-01	2020-03-31	46	1			1
Peru	No entry	Presence	Target	Tajikistan	2020-03-16	2020-06-29	106	2020-04-01	2020-03-31	46	1			1
Peru	No entry	Presence	Target	Tanzania	2020-03-16	2020-06-29	106	2020-04-01	2020-03-31	46	1			1
Peru	No entry	Presence	Target	Thailand	2020-03-16	2020-06-29	106	2020-04-01	2020-03-31	46	1			1
Peru	No entry	Presence	Target	Timor-Leste	2020-03-16	2020-06-29	106	2020-04-01	2020-03-31	46	1			1
Peru	No entry	Presence	Target	Togo	2020-03-16	2020-06-29	106	2020-04-01	2020-03-31	46	1			1
Peru	No entry	Presence	Target	Tonga	2020-03-16	2020-06-29	106	2020-04-01	2020-03-31	46	1			1
Peru	No entry	Presence	Target	Trinidad and Tobago	2020-03-16	2020-06-29	106	2020-04-01	2020-03-31	46	1			1
Peru	No entry	Presence	Target	Tunisia	2020-03-16	2020-06-29	106	2020-04-01	2020-03-31	46	1			1
Peru	No entry	Presence	Target	Turkey	2020-03-16	2020-06-29	106	2020-04-01	2020-03-31	46	1			1
Peru	No entry	Presence	Target	Turkmenistan	2020-03-16	2020-06-29	106	2020-04-01	2020-03-31	46	1			1
Peru	No entry	Presence	Target	Tuvalu	2020-03-16	2020-06-29	106	2020-04-01	2020-03-31	46	1			1
Peru	No entry	Presence	Target	Uganda	2020-03-16	2020-06-29	106	2020-04-01	2020-03-31	46	1			1
Peru	No entry	Presence	Target	Ukraine	2020-03-16	2020-06-29	106	2020-04-01	2020-03-31	46	1			1
Peru	No entry	Presence	Target	United Arab Emirates	2020-03-16	2020-06-29	106	2020-04-01	2020-03-31	46	1			1
Peru	No entry	Presence	Target	United Kingdom	2020-03-16	2020-06-29	106	2020-04-01	2020-03-31	46	1			1
Peru	No entry	Presence	Target	United States	2020-03-16	2020-06-29	212	2020-04-01	2020-03-31	46	1			1
Peru	No entry	Presence	Target	Uruguay	2020-03-16	2020-06-29	106	2020-04-01	2020-03-31	46	1			1
Peru	No entry	Presence	Target	Uzbekistan	2020-03-16	2020-06-29	106	2020-04-01	2020-03-31	46	1			1
Peru	No entry	Presence	Target	Vanuatu	2020-03-16	2020-06-29	106	2020-04-01	2020-03-31	46	1			1
Peru	No entry	Presence	Target	Vatican City	2020-03-16	2020-06-29	106	2020-04-01	2020-03-31	46	1			1
Peru	No entry	Presence	Target	Venezuela	2020-03-16	2020-06-29	106	2020-04-01	2020-03-31	46	1			1
Peru	No entry	Presence	Target	Vietnam	2020-03-16	2020-06-29	106	2020-04-01	2020-03-31	46	1			1
Peru	No entry	Presence	Target	Western Sahara	2020-03-16	2020-06-29	106	2020-04-01	2020-03-31	46	1			1
Peru	No entry	Presence	Target	Yemen	2020-03-16	2020-06-29	106	2020-04-01	2020-03-31	46	1			1
Peru	No entry	Presence	Target	Zambia	2020-03-16	2020-06-29	106	2020-04-01	2020-03-31	46	1			1
Peru	No entry	Presence	Target	Zimbabwe	2020-03-16	2020-06-29	106	2020-04-01	2020-03-31	46	1			1
Peru	Quarantine	Presence	Target	China	2020-03-14	2020-03-15	2				0			1
Peru	Quarantine	Presence	Target	France	2020-03-14	2020-03-15	2				0			1
Peru	Quarantine	Presence	Target	Italy	2020-03-14	2020-03-15	2				0			1
Peru	Quarantine	Presence	Target	Spain	2020-03-14	2020-03-15	2				0			1
Peru	Self-isolation	Presence	Exception	Nationals				2020-03-16	2020-03-29	14	0			1
Peru	Self-isolation	Presence	Exception	Residents				2020-03-16	2020-03-29	14	0			1
Peru	Self-isolation	Presence	Exception	Transport personnel				2020-04-07	2020-04-30	24	0			1
Peru	Self-isolation	Presence	Target	China				2020-03-14	2020-03-15	2	0			1
Peru	Self-isolation	Presence	Target	France				2020-03-14	2020-03-15	2	0			1
Peru	Self-isolation	Presence	Target	Italy				2020-03-14	2020-03-15	2	0			1
Peru	Self-isolation	Presence	Target	Spain				2020-03-14	2020-03-15	2	0			1
Spain	No entry	Presence	Exception	Family of residents / nationals	2020-05-25	2020-06-21	28	2020-05-01	2020-05-31	47	1			1
Spain	No entry	Presence	Exception	Government authorisation				2020-04-01	2020-05-31	77	0			1
Spain	No entry	Presence	Exception	Humanitarian / aid workers	2020-06-22	2020-06-29	8	2020-04-01	2020-05-31	81	1			1
Spain	No entry	Presence	Exception	Humanitarian protection	2020-03-23	2020-06-29	71	2020-04-01	2020-05-31	81	1			1
Spain	No entry	Presence	Exception	Long-term visa				2020-06-01	2020-05-31	16	0			1
Spain	No entry	Presence	Exception	Military personnel	2020-03-23	2020-06-21	91	2020-04-01	2020-05-31	77	1			1
Spain	No entry	Presence	Exception	Nationals	2020-03-23	2020-06-29	99	2020-04-01	2020-05-31	81	1			1
Spain	No entry	Presence	Exception	Nationals of partner countries	2020-03-23	2020-06-29	36	2020-05-01	2020-04-30	23	1			1
Spain	No entry	Presence	Exception	Official delegations	2020-03-23	2020-06-29	190	2020-04-01	2020-05-31	81	1			1
Spain	No entry	Presence	Exception	Other exception (specific)	2020-03-23	2020-06-29	99				0			1
Spain	No entry	Presence	Exception	Passengers in transit	2020-04-06	2020-06-21	77	2020-04-01	2020-05-31	77	1			1
Spain	No entry	Presence	Exception	Residents	2020-04-21	2020-06-29	70	2020-04-01	2020-05-31	81	1			1
Spain	No entry	Presence	Exception	Transport personnel	2020-03-23	2020-06-21	154	2020-04-01	2020-05-31	81	1			1
Spain	No entry	Presence	Exception	Work or business related travel	2020-05-25	2020-06-29	36	2020-04-01	2020-05-31	51	1			1
Spain	No entry	Presence	Target	Afghanistan	2020-03-23	2020-06-29	99	2020-04-01	2020-05-31	81	1			1
Spain	No entry	Presence	Target	Albania	2020-03-23	2020-06-29	99	2020-04-01	2020-05-31	81	1			1
Spain	No entry	Presence	Target	Algeria	2020-03-23	2020-06-29	99	2020-04-01	2020-05-31	81	1			1
Spain	No entry	Presence	Target	Andorra	2020-03-23	2020-06-29	99	2020-04-01	2020-05-31	81	1			1
Spain	No entry	Presence	Target	Angola	2020-03-23	2020-06-29	99	2020-04-01	2020-05-31	81	1			1
Spain	No entry	Presence	Target	Antigua and Barbuda	2020-03-23	2020-06-29	99	2020-04-01	2020-05-31	81	1			1
Spain	No entry	Presence	Target	Argentina	2020-03-23	2020-06-29	99	2020-04-01	2020-05-31	81	1			1
Spain	No entry	Presence	Target	Armenia	2020-03-23	2020-06-29	99	2020-04-01	2020-05-31	81	1			1
Spain	No entry	Presence	Target	Australia	2020-03-23	2020-06-29	99	2020-04-01	2020-05-31	81	1			1
Spain	No entry	Presence	Target	Austria	2020-04-06	2020-06-21	77	2020-04-01	2020-05-31	81	1			1
Spain	No entry	Presence	Target	Azerbaijan	2020-03-23	2020-06-29	99	2020-04-01	2020-05-31	81	1			1
Spain	No entry	Presence	Target	Bahamas	2020-03-23	2020-06-29	99	2020-04-01	2020-05-31	81	1			1
Spain	No entry	Presence	Target	Bahrain	2020-03-23	2020-06-29	99	2020-04-01	2020-05-31	81	1			1
Spain	No entry	Presence	Target	Bangladesh	2020-03-23	2020-06-29	99	2020-04-01	2020-05-31	81	1			1
Spain	No entry	Presence	Target	Barbados	2020-03-23	2020-06-29	99	2020-04-01	2020-05-31	81	1			1
Spain	No entry	Presence	Target	Belarus	2020-03-23	2020-06-29	99	2020-04-01	2020-05-31	81	1			1
Spain	No entry	Presence	Target	Belgium	2020-04-06	2020-06-21	77	2020-04-01	2020-05-31	81	1			1
Spain	No entry	Presence	Target	Belize	2020-03-23	2020-06-29	99	2020-04-01	2020-05-31	81	1			1
Spain	No entry	Presence	Target	Benin	2020-03-23	2020-06-29	99	2020-04-01	2020-05-31	81	1			1
Spain	No entry	Presence	Target	Bermuda	2020-03-23	2020-06-29	99	2020-04-01	2020-05-31	81	1			1
Spain	No entry	Presence	Target	Bhutan	2020-03-23	2020-06-29	99	2020-04-01	2020-05-31	81	1			1
Spain	No entry	Presence	Target	Bolivia	2020-03-23	2020-06-29	99	2020-04-01	2020-05-31	81	1			1
Spain	No entry	Presence	Target	Bosnia and Herzegovina	2020-03-23	2020-06-29	99	2020-04-01	2020-05-31	81	1			1
Spain	No entry	Presence	Target	Botswana	2020-03-23	2020-06-29	99	2020-04-01	2020-05-31	81	1			1
Spain	No entry	Presence	Target	Brazil	2020-03-23	2020-06-29	99	2020-04-01	2020-05-31	81	1			1
Spain	No entry	Presence	Target	British Virgin Islands	2020-03-23	2020-06-29	99	2020-04-01	2020-05-31	81	1			1
Spain	No entry	Presence	Target	Brunei	2020-03-23	2020-06-29	99	2020-04-01	2020-05-31	81	1			1
Spain	No entry	Presence	Target	Bulgaria	2020-04-06	2020-06-21	77	2020-04-01	2020-05-31	81	1			1
Spain	No entry	Presence	Target	Burkina Faso	2020-03-23	2020-06-29	99	2020-04-01	2020-05-31	81	1			1
Spain	No entry	Presence	Target	Burundi	2020-03-23	2020-06-29	99	2020-04-01	2020-05-31	81	1			1
Spain	No entry	Presence	Target	Buthan				2020-04-01	2020-05-31	81	0			1
Spain	No entry	Presence	Target	Cambodia	2020-03-23	2020-06-29	99	2020-04-01	2020-05-31	81	1			1
Spain	No entry	Presence	Target	Cameroon	2020-03-23	2020-06-29	99	2020-04-01	2020-05-31	81	1			1
Spain	No entry	Presence	Target	Canada	2020-03-23	2020-06-29	99	2020-04-01	2020-05-31	81	1			1
Spain	No entry	Presence	Target	Cape Verde	2020-03-23	2020-06-29	99	2020-04-01	2020-05-31	81	1			1
Spain	No entry	Presence	Target	Cayman Islands	2020-03-23	2020-06-29	99	2020-04-01	2020-05-31	81	1			1
Spain	No entry	Presence	Target	Central African Republic	2020-03-23	2020-06-29	99	2020-04-01	2020-05-31	81	1			1
Spain	No entry	Presence	Target	Chad	2020-03-23	2020-06-29	99	2020-04-01	2020-05-31	81	1			1
Spain	No entry	Presence	Target	Chile	2020-03-23	2020-06-29	99	2020-04-01	2020-05-31	81	1			1
Spain	No entry	Presence	Target	China	2020-03-23	2020-06-29	99	2020-04-01	2020-05-31	81	1			1
Spain	No entry	Presence	Target	Colombia	2020-03-23	2020-06-29	99	2020-04-01	2020-05-31	81	1			1
Spain	No entry	Presence	Target	Comoros	2020-03-23	2020-06-29	99	2020-04-01	2020-05-31	81	1			1
Spain	No entry	Presence	Target	Congo (Brazzaville)	2020-03-23	2020-06-29	99	2020-04-01	2020-05-31	81	1			1
Spain	No entry	Presence	Target	Congo (Kinshasa)	2020-03-23	2020-06-29	99	2020-04-01	2020-05-31	81	1			1
Spain	No entry	Presence	Target	Costa Rica	2020-03-23	2020-06-29	99	2020-04-01	2020-05-31	81	1			1
Spain	No entry	Presence	Target	Côte d'Ivoire	2020-03-23	2020-06-29	99	2020-04-01	2020-05-31	81	1			1
Spain	No entry	Presence	Target	Croatia	2020-04-06	2020-06-21	77	2020-04-01	2020-05-31	81	1			1
Spain	No entry	Presence	Target	Cuba	2020-03-23	2020-06-29	99	2020-04-01	2020-05-31	81	1			1
Spain	No entry	Presence	Target	Curaçao	2020-03-23	2020-06-29	99	2020-04-01	2020-05-31	81	1			1
Spain	No entry	Presence	Target	Cyprus	2020-04-06	2020-06-21	77	2020-04-01	2020-05-31	81	1			1
Spain	No entry	Presence	Target	Czech Republic	2020-04-06	2020-06-21	154	2020-04-01	2020-05-31	81	1			1
Spain	No entry	Presence	Target	Denmark	2020-04-06	2020-06-21	77	2020-04-01	2020-05-31	81	1			1
Spain	No entry	Presence	Target	Djibouti	2020-03-23	2020-06-29	99	2020-04-01	2020-05-31	81	1			1
Spain	No entry	Presence	Target	Dominica	2020-03-23	2020-06-29	99	2020-04-01	2020-05-31	81	1			1
Spain	No entry	Presence	Target	Dominican Republic	2020-03-23	2020-06-29	99	2020-04-01	2020-05-31	81	1			1
Spain	No entry	Presence	Target	Ecuador	2020-03-23	2020-06-29	99	2020-04-01	2020-05-31	81	1			1
Spain	No entry	Presence	Target	Egypt	2020-03-23	2020-06-29	99	2020-04-01	2020-05-31	81	1			1
Spain	No entry	Presence	Target	El Salvador	2020-03-23	2020-06-29	99	2020-04-01	2020-05-31	81	1			1
Spain	No entry	Presence	Target	Equatorial Guinea	2020-03-23	2020-06-29	99	2020-04-01	2020-05-31	81	1			1
Spain	No entry	Presence	Target	Eritrea	2020-03-23	2020-06-29	99	2020-04-01	2020-05-31	81	1			1
Spain	No entry	Presence	Target	Estonia	2020-04-06	2020-06-21	77	2020-04-01	2020-05-31	81	1			1
Spain	No entry	Presence	Target	Ethiopia	2020-03-23	2020-06-29	99	2020-04-01	2020-05-31	81	1			1
Spain	No entry	Presence	Target	Faeroe Islands	2020-03-23	2020-06-29	99	2020-04-01	2020-05-31	81	1			1
Spain	No entry	Presence	Target	Falkland Islands	2020-03-23	2020-06-29	99	2020-04-01	2020-05-31	81	1			1
Spain	No entry	Presence	Target	Fiji	2020-03-23	2020-06-29	99	2020-04-01	2020-05-31	81	1			1
Spain	No entry	Presence	Target	Finland	2020-04-06	2020-06-21	77	2020-04-01	2020-05-31	81	1			1
Spain	No entry	Presence	Target	France	2020-04-06	2020-06-21	77	2020-04-01	2020-05-31	81	1			1
Spain	No entry	Presence	Target	Gabon	2020-03-23	2020-06-29	99	2020-04-01	2020-05-31	81	1			1
Spain	No entry	Presence	Target	Gambia	2020-03-23	2020-06-29	99	2020-04-01	2020-05-31	81	1			1
Spain	No entry	Presence	Target	Georgia	2020-03-23	2020-06-29	99	2020-04-01	2020-05-31	81	1			1
Spain	No entry	Presence	Target	Germany	2020-04-06	2020-06-21	77	2020-04-01	2020-05-31	81	1			1
Spain	No entry	Presence	Target	Ghana	2020-03-23	2020-06-29	99	2020-04-01	2020-05-31	81	1			1
Spain	No entry	Presence	Target	Gibraltar	2020-03-23	2020-06-29	99	2020-04-01	2020-05-31	81	1			1
Spain	No entry	Presence	Target	Greece	2020-04-06	2020-06-21	77	2020-04-01	2020-05-31	81	1			1
Spain	No entry	Presence	Target	Grenada	2020-03-23	2020-06-29	99	2020-04-01	2020-05-31	81	1			1
Spain	No entry	Presence	Target	Guadeloupe	2020-03-23	2020-06-29	99	2020-04-01	2020-05-31	81	1			1
Spain	No entry	Presence	Target	Guam	2020-03-23	2020-06-29	99	2020-04-01	2020-05-31	81	1			1
Spain	No entry	Presence	Target	Guatemala	2020-03-23	2020-06-29	99	2020-04-01	2020-05-31	81	1			1
Spain	No entry	Presence	Target	Guinea	2020-03-23	2020-06-29	99	2020-04-01	2020-05-31	81	1			1
Spain	No entry	Presence	Target	Guinea-Bissau	2020-03-23	2020-06-29	99	2020-04-01	2020-05-31	81	1			1
Spain	No entry	Presence	Target	Guyana	2020-03-23	2020-06-29	99	2020-04-01	2020-05-31	81	1			1
Spain	No entry	Presence	Target	Haiti	2020-03-23	2020-06-29	99	2020-04-01	2020-05-31	81	1			1
Spain	No entry	Presence	Target	Honduras	2020-03-23	2020-06-29	99	2020-04-01	2020-05-31	81	1			1
Spain	No entry	Presence	Target	Hong Kong	2020-03-23	2020-06-29	99	2020-04-01	2020-05-31	81	1			1
Spain	No entry	Presence	Target	Hungary	2020-04-06	2020-06-21	77	2020-04-01	2020-05-31	81	1			1
Spain	No entry	Presence	Target	Iceland	2020-04-06	2020-06-21	77	2020-04-01	2020-05-31	81	1			1
Spain	No entry	Presence	Target	India	2020-03-23	2020-06-29	99	2020-04-01	2020-05-31	81	1			1
Spain	No entry	Presence	Target	Indonesia	2020-03-23	2020-06-29	99	2020-04-01	2020-05-31	81	1			1
Spain	No entry	Presence	Target	Iran	2020-03-23	2020-06-29	99	2020-04-01	2020-05-31	81	1			1
Spain	No entry	Presence	Target	Iraq	2020-03-23	2020-06-29	99	2020-04-01	2020-05-31	81	1			1
Spain	No entry	Presence	Target	Ireland	2020-04-06	2020-06-21	77	2020-04-01	2020-05-31	81	1			1
Spain	No entry	Presence	Target	Israel	2020-03-23	2020-06-29	99	2020-04-01	2020-05-31	81	1			1
Spain	No entry	Presence	Target	Italy	2020-04-06	2020-06-21	77	2020-04-01	2020-05-31	81	1			1
Spain	No entry	Presence	Target	Jamaica	2020-03-23	2020-06-29	99	2020-04-01	2020-05-31	81	1			1
Spain	No entry	Presence	Target	Japan	2020-03-23	2020-06-29	99	2020-04-01	2020-05-31	81	1			1
Spain	No entry	Presence	Target	Jordan	2020-03-23	2020-06-29	99	2020-04-01	2020-05-31	81	1			1
Spain	No entry	Presence	Target	Kazakhstan	2020-03-23	2020-06-29	99	2020-04-01	2020-05-31	81	1			1
Spain	No entry	Presence	Target	Kenya	2020-03-23	2020-06-29	99	2020-04-01	2020-05-31	81	1			1
Spain	No entry	Presence	Target	Kosovo	2020-03-23	2020-06-29	99	2020-04-01	2020-05-31	81	1			1
Spain	No entry	Presence	Target	Kuwait	2020-03-23	2020-06-29	99	2020-04-01	2020-05-31	81	1			1
Spain	No entry	Presence	Target	Kyrgyzstan	2020-03-23	2020-06-29	99	2020-04-01	2020-05-31	81	1			1
Spain	No entry	Presence	Target	Laos	2020-03-23	2020-06-29	99	2020-04-01	2020-05-31	81	1			1
Spain	No entry	Presence	Target	Latvia	2020-04-06	2020-06-21	77	2020-04-01	2020-05-31	81	1			1
Spain	No entry	Presence	Target	Lebanon	2020-03-23	2020-06-29	99	2020-04-01	2020-05-31	81	1			1
Spain	No entry	Presence	Target	Lesotho	2020-03-23	2020-06-29	99	2020-04-01	2020-05-31	81	1			1
Spain	No entry	Presence	Target	Liberia	2020-03-23	2020-06-29	99	2020-04-01	2020-05-31	81	1			1
Spain	No entry	Presence	Target	Libya	2020-03-23	2020-06-29	99	2020-04-01	2020-05-31	81	1			1
Spain	No entry	Presence	Target	Liechtenstein	2020-04-06	2020-06-21	77	2020-04-01	2020-05-31	81	1			1
Spain	No entry	Presence	Target	Lithuania	2020-04-06	2020-06-21	77	2020-04-01	2020-05-31	81	1			1
Spain	No entry	Presence	Target	Luxembourg	2020-04-06	2020-06-21	77	2020-04-01	2020-05-31	81	1			1
Spain	No entry	Presence	Target	Macao	2020-03-23	2020-06-29	99	2020-04-01	2020-05-31	81	1			1
Spain	No entry	Presence	Target	Macedonia	2020-03-23	2020-06-29	99	2020-04-01	2020-05-31	81	1			1
Spain	No entry	Presence	Target	Madagascar	2020-03-23	2020-06-29	99	2020-04-01	2020-05-31	81	1			1
Spain	No entry	Presence	Target	Malawi	2020-03-23	2020-06-29	99	2020-04-01	2020-05-31	81	1			1
Spain	No entry	Presence	Target	Malaysia	2020-03-23	2020-06-29	99	2020-04-01	2020-05-31	81	1			1
Spain	No entry	Presence	Target	Maldives	2020-03-23	2020-06-29	99	2020-04-01	2020-05-31	81	1			1
Spain	No entry	Presence	Target	Mali	2020-03-23	2020-06-29	99	2020-04-01	2020-05-31	81	1			1
Spain	No entry	Presence	Target	Malta	2020-04-06	2020-06-21	77	2020-04-01	2020-05-31	81	1			1
Spain	No entry	Presence	Target	Mauritania	2020-03-23	2020-06-29	99	2020-04-01	2020-05-31	81	1			1
Spain	No entry	Presence	Target	Mauritius	2020-03-23	2020-06-29	99	2020-04-01	2020-05-31	81	1			1
Spain	No entry	Presence	Target	Mexico	2020-03-23	2020-06-29	99	2020-04-01	2020-05-31	81	1			1
Spain	No entry	Presence	Target	Micronesia	2020-03-23	2020-06-29	99	2020-04-01	2020-05-31	81	1			1
Spain	No entry	Presence	Target	Moldova	2020-03-23	2020-06-29	99	2020-04-01	2020-05-31	81	1			1
Spain	No entry	Presence	Target	Monaco	2020-03-23	2020-06-29	99	2020-04-01	2020-05-31	81	1			1
Spain	No entry	Presence	Target	Mongolia	2020-03-23	2020-06-29	99	2020-04-01	2020-05-31	81	1			1
Spain	No entry	Presence	Target	Montenegro	2020-03-23	2020-06-29	99	2020-04-01	2020-05-31	81	1			1
Spain	No entry	Presence	Target	Montserrat	2020-03-23	2020-06-29	99	2020-04-01	2020-05-31	81	1			1
Spain	No entry	Presence	Target	Morocco	2020-03-23	2020-06-29	99	2020-04-01	2020-05-31	81	1			1
Spain	No entry	Presence	Target	Mozambique	2020-03-23	2020-06-29	99	2020-04-01	2020-05-31	81	1			1
Spain	No entry	Presence	Target	Myanmar	2020-03-23	2020-06-29	99	2020-04-01	2020-05-31	81	1			1
Spain	No entry	Presence	Target	Namibia	2020-03-23	2020-06-29	99	2020-04-01	2020-05-31	81	1			1
Spain	No entry	Presence	Target	Nauru	2020-03-23	2020-06-29	99	2020-04-01	2020-05-31	81	1			1
Spain	No entry	Presence	Target	Nepal	2020-03-23	2020-06-29	99	2020-04-01	2020-05-31	81	1			1
Spain	No entry	Presence	Target	Netherlands	2020-04-06	2020-06-21	77	2020-04-01	2020-05-31	81	1			1
Spain	No entry	Presence	Target	New Caledonia	2020-03-23	2020-06-29	99	2020-04-01	2020-05-31	81	1			1
Spain	No entry	Presence	Target	New Zealand	2020-03-23	2020-06-29	99	2020-04-01	2020-05-31	81	1			1
Spain	No entry	Presence	Target	Nicaragua	2020-03-23	2020-06-29	99	2020-04-01	2020-05-31	81	1			1
Spain	No entry	Presence	Target	Niger	2020-03-23	2020-06-29	99	2020-04-01	2020-05-31	81	1			1
Spain	No entry	Presence	Target	Nigeria	2020-03-23	2020-06-29	99	2020-04-01	2020-05-31	81	1			1
Spain	No entry	Presence	Target	North Korea	2020-03-23	2020-06-29	99	2020-04-01	2020-05-31	81	1			1
Spain	No entry	Presence	Target	Norway	2020-04-06	2020-06-21	77	2020-04-01	2020-05-31	81	1			1
Spain	No entry	Presence	Target	Oman	2020-03-23	2020-06-29	99	2020-04-01	2020-05-31	81	1			1
Spain	No entry	Presence	Target	Pakistan	2020-03-23	2020-06-29	99	2020-04-01	2020-05-31	81	1			1
Spain	No entry	Presence	Target	Palau	2020-03-23	2020-06-29	99	2020-04-01	2020-05-31	81	1			1
Spain	No entry	Presence	Target	Palestine	2020-03-23	2020-06-29	99	2020-04-01	2020-05-31	81	1			1
Spain	No entry	Presence	Target	Panama	2020-03-23	2020-06-29	99	2020-04-01	2020-05-31	81	1			1
Spain	No entry	Presence	Target	Papua New Guinea	2020-03-23	2020-06-29	99	2020-04-01	2020-05-31	81	1			1
Spain	No entry	Presence	Target	Paraguay	2020-03-23	2020-06-29	99	2020-04-01	2020-05-31	81	1			1
Spain	No entry	Presence	Target	Peru	2020-03-23	2020-06-29	99	2020-04-01	2020-05-31	81	1			1
Spain	No entry	Presence	Target	Philippines	2020-03-23	2020-06-29	99	2020-04-01	2020-05-31	81	1			1
Spain	No entry	Presence	Target	Poland	2020-04-06	2020-06-21	77	2020-04-01	2020-05-31	81	1			1
Spain	No entry	Presence	Target	Portugal	2020-04-06	2020-06-21	77	2020-04-01	2020-05-31	81	1			1
Spain	No entry	Presence	Target	Qatar	2020-03-23	2020-06-29	99	2020-04-01	2020-05-31	81	1			1
Spain	No entry	Presence	Target	Romania	2020-04-06	2020-06-21	77	2020-04-01	2020-05-31	81	1			1
Spain	No entry	Presence	Target	Russia	2020-03-23	2020-06-29	99	2020-04-01	2020-05-31	81	1			1
Spain	No entry	Presence	Target	Rwanda	2020-03-23	2020-06-29	99	2020-04-01	2020-05-31	81	1			1
Spain	No entry	Presence	Target	Saint Kitts and Nevis	2020-03-23	2020-06-29	99	2020-04-01	2020-05-31	81	1			1
Spain	No entry	Presence	Target	Saint Lucia	2020-03-23	2020-06-29	99	2020-04-01	2020-05-31	81	1			1
Spain	No entry	Presence	Target	Saint Pierre and Miquelon	2020-03-23	2020-06-29	99	2020-04-01	2020-05-31	81	1			1
Spain	No entry	Presence	Target	Saint Vincent and the Grenadines	2020-03-23	2020-06-29	99	2020-04-01	2020-05-31	81	1			1
Spain	No entry	Presence	Target	Samoa	2020-03-23	2020-06-29	99	2020-04-01	2020-05-31	81	1			1
Spain	No entry	Presence	Target	San Marino	2020-03-23	2020-06-29	99	2020-04-01	2020-05-31	81	1			1
Spain	No entry	Presence	Target	São Tomé and Príncipe	2020-03-23	2020-06-29	99	2020-04-01	2020-05-31	81	1			1
Spain	No entry	Presence	Target	Saudi Arabia	2020-03-23	2020-06-29	99	2020-04-01	2020-05-31	81	1			1
Spain	No entry	Presence	Target	Senegal	2020-03-23	2020-06-29	99	2020-04-01	2020-05-31	81	1			1
Spain	No entry	Presence	Target	Serbia	2020-03-23	2020-06-29	198	2020-04-01	2020-05-31	81	1			1
Spain	No entry	Presence	Target	Seychelles	2020-03-23	2020-06-29	99	2020-04-01	2020-05-31	81	1			1
Spain	No entry	Presence	Target	Sierra Leone	2020-03-23	2020-06-29	99	2020-04-01	2020-05-31	81	1			1
Spain	No entry	Presence	Target	Singapore	2020-03-23	2020-06-29	99	2020-04-01	2020-05-31	81	1			1
Spain	No entry	Presence	Target	Slovakia	2020-04-06	2020-06-21	77	2020-04-01	2020-05-31	81	1			1
Spain	No entry	Presence	Target	Slovenia	2020-04-06	2020-06-21	77	2020-04-01	2020-05-31	81	1			1
Spain	No entry	Presence	Target	Solomon Islands	2020-03-23	2020-06-29	99	2020-04-01	2020-05-31	81	1			1
Spain	No entry	Presence	Target	Somalia	2020-03-23	2020-06-29	99	2020-04-01	2020-05-31	81	1			1
Spain	No entry	Presence	Target	South Africa	2020-03-23	2020-06-29	99	2020-04-01	2020-05-31	81	1			1
Spain	No entry	Presence	Target	South Korea	2020-03-23	2020-06-29	99	2020-04-01	2020-05-31	81	1			1
Spain	No entry	Presence	Target	South Sudan	2020-03-23	2020-06-29	99	2020-04-01	2020-05-31	81	1			1
Spain	No entry	Presence	Target	Spain	2020-03-23	2020-06-29	176	2020-04-01	2020-05-31	81	1			1
Spain	No entry	Presence	Target	Sri Lanka	2020-03-23	2020-06-29	99	2020-04-01	2020-05-31	81	1			1
Spain	No entry	Presence	Target	Sudan	2020-03-23	2020-06-29	99	2020-04-01	2020-05-31	81	1			1
Spain	No entry	Presence	Target	Suriname	2020-03-23	2020-06-29	99	2020-04-01	2020-05-31	81	1			1
Spain	No entry	Presence	Target	Svalbard and Jan Mayen	2020-03-23	2020-06-29	99	2020-04-01	2020-05-31	81	1			1
Spain	No entry	Presence	Target	Swaziland	2020-03-23	2020-06-29	99	2020-04-01	2020-05-31	81	1			1
Spain	No entry	Presence	Target	Sweden	2020-04-06	2020-06-21	77	2020-04-01	2020-05-31	81	1			1
Spain	No entry	Presence	Target	Switzerland	2020-04-06	2020-06-21	77	2020-04-01	2020-05-31	81	1			1
Spain	No entry	Presence	Target	Syria	2020-03-23	2020-06-29	99	2020-04-01	2020-05-31	81	1			1
Spain	No entry	Presence	Target	Taiwan	2020-03-23	2020-06-29	99	2020-04-01	2020-05-31	81	1			1
Spain	No entry	Presence	Target	Tajikistan	2020-03-23	2020-06-29	99	2020-04-01	2020-05-31	81	1			1
Spain	No entry	Presence	Target	Tanzania	2020-03-23	2020-06-29	99	2020-04-01	2020-05-31	81	1			1
Spain	No entry	Presence	Target	Thailand	2020-03-23	2020-06-29	99	2020-04-01	2020-05-31	81	1			1
Spain	No entry	Presence	Target	Timor-Leste	2020-03-23	2020-06-29	99	2020-04-01	2020-05-31	81	1			1
Spain	No entry	Presence	Target	Togo	2020-03-23	2020-06-29	99	2020-04-01	2020-05-31	81	1			1
Spain	No entry	Presence	Target	Tonga	2020-03-23	2020-06-29	99	2020-04-01	2020-05-31	81	1			1
Spain	No entry	Presence	Target	Trinidad and Tobago	2020-03-23	2020-06-29	99	2020-04-01	2020-05-31	81	1			1
Spain	No entry	Presence	Target	Tunisia	2020-03-23	2020-06-29	99	2020-04-01	2020-05-31	81	1			1
Spain	No entry	Presence	Target	Turkey	2020-03-23	2020-06-29	99	2020-04-01	2020-05-31	81	1			1
Spain	No entry	Presence	Target	Turkmenistan	2020-03-23	2020-06-29	99	2020-04-01	2020-05-31	81	1			1
Spain	No entry	Presence	Target	Tuvalu	2020-03-23	2020-06-29	99	2020-04-01	2020-05-31	81	1			1
Spain	No entry	Presence	Target	Uganda	2020-03-23	2020-06-29	99	2020-04-01	2020-05-31	81	1			1
Spain	No entry	Presence	Target	Ukraine	2020-03-23	2020-06-29	99	2020-04-01	2020-05-31	81	1			1
Spain	No entry	Presence	Target	United Arab Emirates	2020-03-23	2020-06-29	99	2020-04-01	2020-05-31	81	1			1
Spain	No entry	Presence	Target	United Kingdom	2020-03-23	2020-06-21	91	2020-04-01	2020-05-31	81	1			1
Spain	No entry	Presence	Target	United States	2020-03-23	2020-06-29	198	2020-04-01	2020-05-31	81	1			1
Spain	No entry	Presence	Target	Uruguay	2020-03-23	2020-06-29	99	2020-04-01	2020-05-31	81	1			1
Spain	No entry	Presence	Target	Uzbekistan	2020-03-23	2020-06-29	99	2020-04-01	2020-05-31	81	1			1
Spain	No entry	Presence	Target	Vanuatu	2020-03-23	2020-06-29	99	2020-04-01	2020-05-31	81	1			1
Spain	No entry	Presence	Target	Vatican City	2020-03-23	2020-06-29	99	2020-04-01	2020-05-31	81	1			1
Spain	No entry	Presence	Target	Venezuela	2020-03-23	2020-06-29	99	2020-04-01	2020-05-31	81	1			1
Spain	No entry	Presence	Target	Vietnam	2020-03-23	2020-06-29	99	2020-04-01	2020-05-31	81	1			1
Spain	No entry	Presence	Target	Western Sahara	2020-03-23	2020-06-29	99	2020-04-01	2020-05-31	81	1			1
Spain	No entry	Presence	Target	Yemen	2020-03-23	2020-06-29	99	2020-04-01	2020-05-31	81	1			1
Spain	No entry	Presence	Target	Zambia	2020-03-23	2020-06-29	99	2020-04-01	2020-05-31	81	1			1
Spain	No entry	Presence	Target	Zimbabwe	2020-03-23	2020-06-29	99	2020-04-01	2020-05-31	81	1			1
Spain	Self-isolation	Presence	Exception	Humanitarian / aid workers	2020-05-25	2020-06-21	28	2020-06-01	2020-05-31	30	1			1
Spain	Self-isolation	Presence	Exception	Transport personnel	2020-05-25	2020-06-21	28	2020-06-01	2020-05-31	30	1			1
Spain	Self-isolation	Presence	Target	Afghanistan	2020-05-25	2020-06-21	28	2020-06-01	2020-05-31	30	1			1
Spain	Self-isolation	Presence	Target	Albania	2020-05-25	2020-06-21	28	2020-06-01	2020-05-31	30	1			1
Spain	Self-isolation	Presence	Target	Algeria	2020-05-25	2020-06-21	28	2020-06-01	2020-05-31	30	1			1
Spain	Self-isolation	Presence	Target	Andorra	2020-05-25	2020-06-21	28	2020-06-01	2020-05-31	30	1			1
Spain	Self-isolation	Presence	Target	Angola	2020-05-25	2020-06-21	28	2020-06-01	2020-05-31	30	1			1
Spain	Self-isolation	Presence	Target	Antigua and Barbuda	2020-05-25	2020-06-21	28	2020-06-01	2020-05-31	30	1			1
Spain	Self-isolation	Presence	Target	Argentina	2020-05-25	2020-06-21	28	2020-06-01	2020-05-31	30	1			1
Spain	Self-isolation	Presence	Target	Armenia	2020-05-25	2020-06-21	28	2020-06-01	2020-05-31	30	1			1
Spain	Self-isolation	Presence	Target	Australia	2020-05-25	2020-06-21	28	2020-06-01	2020-05-31	30	1			1
Spain	Self-isolation	Presence	Target	Austria	2020-05-25	2020-06-21	28	2020-06-01	2020-05-31	30	1			1
Spain	Self-isolation	Presence	Target	Azerbaijan	2020-05-25	2020-06-21	28	2020-06-01	2020-05-31	30	1			1
Spain	Self-isolation	Presence	Target	Bahamas	2020-05-25	2020-06-21	28	2020-06-01	2020-05-31	30	1			1
Spain	Self-isolation	Presence	Target	Bahrain	2020-05-25	2020-06-21	28	2020-06-01	2020-05-31	30	1			1
Spain	Self-isolation	Presence	Target	Bangladesh	2020-05-25	2020-06-21	28	2020-06-01	2020-05-31	30	1			1
Spain	Self-isolation	Presence	Target	Barbados	2020-05-25	2020-06-21	28	2020-06-01	2020-05-31	30	1			1
Spain	Self-isolation	Presence	Target	Belarus	2020-05-25	2020-06-21	28	2020-06-01	2020-05-31	30	1			1
Spain	Self-isolation	Presence	Target	Belgium	2020-05-25	2020-06-21	28	2020-06-01	2020-05-31	30	1			1
Spain	Self-isolation	Presence	Target	Belize	2020-05-25	2020-06-21	28	2020-06-01	2020-05-31	30	1			1
Spain	Self-isolation	Presence	Target	Benin	2020-05-25	2020-06-21	28	2020-06-01	2020-05-31	30	1			1
Spain	Self-isolation	Presence	Target	Bermuda	2020-05-25	2020-06-21	28	2020-06-01	2020-05-31	30	1			1
Spain	Self-isolation	Presence	Target	Bhutan	2020-05-25	2020-06-21	28	2020-06-01	2020-05-31	30	1			1
Spain	Self-isolation	Presence	Target	Bolivia	2020-05-25	2020-06-21	28	2020-06-01	2020-05-31	30	1			1
Spain	Self-isolation	Presence	Target	Bosnia and Herzegovina	2020-05-25	2020-06-21	28	2020-06-01	2020-05-31	30	1			1
Spain	Self-isolation	Presence	Target	Botswana	2020-05-25	2020-06-21	28	2020-06-01	2020-05-31	30	1			1
Spain	Self-isolation	Presence	Target	Brazil	2020-05-25	2020-06-21	28	2020-06-01	2020-05-31	30	1			1
Spain	Self-isolation	Presence	Target	British Virgin Islands	2020-05-25	2020-06-21	28	2020-06-01	2020-05-31	30	1			1
Spain	Self-isolation	Presence	Target	Brunei	2020-05-25	2020-06-21	28	2020-06-01	2020-05-31	30	1			1
Spain	Self-isolation	Presence	Target	Bulgaria	2020-05-25	2020-06-21	28	2020-06-01	2020-05-31	30	1			1
Spain	Self-isolation	Presence	Target	Burkina Faso	2020-05-25	2020-06-21	28	2020-06-01	2020-05-31	30	1			1
Spain	Self-isolation	Presence	Target	Burundi	2020-05-25	2020-06-21	28	2020-06-01	2020-05-31	30	1			1
Spain	Self-isolation	Presence	Target	Buthan				2020-06-01	2020-05-31	30	0			1
Spain	Self-isolation	Presence	Target	Cambodia	2020-05-25	2020-06-21	28	2020-06-01	2020-05-31	30	1			1
Spain	Self-isolation	Presence	Target	Cameroon	2020-05-25	2020-06-21	28	2020-06-01	2020-05-31	30	1			1
Spain	Self-isolation	Presence	Target	Canada	2020-05-25	2020-06-21	28	2020-06-01	2020-05-31	30	1			1
Spain	Self-isolation	Presence	Target	Cape Verde	2020-05-25	2020-06-21	28	2020-06-01	2020-05-31	30	1			1
Spain	Self-isolation	Presence	Target	Cayman Islands	2020-05-25	2020-06-21	28	2020-06-01	2020-05-31	30	1			1
Spain	Self-isolation	Presence	Target	Central African Republic	2020-05-25	2020-06-21	28	2020-06-01	2020-05-31	30	1			1
Spain	Self-isolation	Presence	Target	Chad	2020-05-25	2020-06-21	28	2020-06-01	2020-05-31	30	1			1
Spain	Self-isolation	Presence	Target	Chile	2020-05-25	2020-06-21	28	2020-06-01	2020-05-31	30	1			1
Spain	Self-isolation	Presence	Target	China	2020-05-25	2020-06-21	28	2020-06-01	2020-05-31	30	1			1
Spain	Self-isolation	Presence	Target	Colombia	2020-05-25	2020-06-21	28	2020-06-01	2020-05-31	30	1			1
Spain	Self-isolation	Presence	Target	Comoros	2020-05-25	2020-06-21	28	2020-06-01	2020-05-31	30	1			1
Spain	Self-isolation	Presence	Target	Congo (Brazzaville)	2020-05-25	2020-06-21	28	2020-06-01	2020-05-31	30	1			1
Spain	Self-isolation	Presence	Target	Congo (Kinshasa)	2020-05-25	2020-06-21	28	2020-06-01	2020-05-31	30	1			1
Spain	Self-isolation	Presence	Target	Costa Rica	2020-05-25	2020-06-21	28	2020-06-01	2020-05-31	30	1			1
Spain	Self-isolation	Presence	Target	Côte d'Ivoire	2020-05-25	2020-06-21	28	2020-06-01	2020-05-31	30	1			1
Spain	Self-isolation	Presence	Target	Croatia	2020-05-25	2020-06-21	28	2020-06-01	2020-05-31	30	1			1
Spain	Self-isolation	Presence	Target	Cuba	2020-05-25	2020-06-21	28	2020-06-01	2020-05-31	30	1			1
Spain	Self-isolation	Presence	Target	Curaçao	2020-05-25	2020-06-21	28	2020-06-01	2020-05-31	30	1			1
Spain	Self-isolation	Presence	Target	Cyprus	2020-05-25	2020-06-21	28	2020-06-01	2020-05-31	30	1			1
Spain	Self-isolation	Presence	Target	Czech Republic	2020-05-25	2020-06-21	56	2020-06-01	2020-05-31	30	1			1
Spain	Self-isolation	Presence	Target	Denmark	2020-05-25	2020-06-21	28	2020-06-01	2020-05-31	30	1			1
Spain	Self-isolation	Presence	Target	Djibouti	2020-05-25	2020-06-21	28	2020-06-01	2020-05-31	30	1			1
Spain	Self-isolation	Presence	Target	Dominica	2020-05-25	2020-06-21	28	2020-06-01	2020-05-31	30	1			1
Spain	Self-isolation	Presence	Target	Dominican Republic	2020-05-25	2020-06-21	28	2020-06-01	2020-05-31	30	1			1
Spain	Self-isolation	Presence	Target	Ecuador	2020-05-25	2020-06-21	28	2020-06-01	2020-05-31	30	1			1
Spain	Self-isolation	Presence	Target	Egypt	2020-05-25	2020-06-21	28	2020-06-01	2020-05-31	30	1			1
Spain	Self-isolation	Presence	Target	El Salvador	2020-05-25	2020-06-21	28	2020-06-01	2020-05-31	30	1			1
Spain	Self-isolation	Presence	Target	Equatorial Guinea	2020-05-25	2020-06-21	28	2020-06-01	2020-05-31	30	1			1
Spain	Self-isolation	Presence	Target	Eritrea	2020-05-25	2020-06-21	28	2020-06-01	2020-05-31	30	1			1
Spain	Self-isolation	Presence	Target	Estonia	2020-05-25	2020-06-21	28	2020-06-01	2020-05-31	30	1			1
Spain	Self-isolation	Presence	Target	Ethiopia	2020-05-25	2020-06-21	28	2020-06-01	2020-05-31	30	1			1
Spain	Self-isolation	Presence	Target	Faeroe Islands	2020-05-25	2020-06-21	28	2020-06-01	2020-05-31	30	1			1
Spain	Self-isolation	Presence	Target	Falkland Islands	2020-05-25	2020-06-21	28	2020-06-01	2020-05-31	30	1			1
Spain	Self-isolation	Presence	Target	Fiji	2020-05-25	2020-06-21	28	2020-06-01	2020-05-31	30	1			1
Spain	Self-isolation	Presence	Target	Finland	2020-05-25	2020-06-21	28	2020-06-01	2020-05-31	30	1			1
Spain	Self-isolation	Presence	Target	France	2020-05-25	2020-06-21	28	2020-06-01	2020-05-31	30	1			1
Spain	Self-isolation	Presence	Target	Gabon	2020-05-25	2020-06-21	28	2020-06-01	2020-05-31	30	1			1
Spain	Self-isolation	Presence	Target	Gambia	2020-05-25	2020-06-21	28	2020-06-01	2020-05-31	30	1			1
Spain	Self-isolation	Presence	Target	Georgia	2020-05-25	2020-06-21	28	2020-06-01	2020-05-31	30	1			1
Spain	Self-isolation	Presence	Target	Germany	2020-05-25	2020-06-21	28	2020-06-01	2020-05-31	30	1			1
Spain	Self-isolation	Presence	Target	Ghana	2020-05-25	2020-06-21	28	2020-06-01	2020-05-31	30	1			1
Spain	Self-isolation	Presence	Target	Gibraltar	2020-05-25	2020-06-21	28	2020-06-01	2020-05-31	30	1			1
Spain	Self-isolation	Presence	Target	Greece	2020-05-25	2020-06-21	28	2020-06-01	2020-05-31	30	1			1
Spain	Self-isolation	Presence	Target	Grenada	2020-05-25	2020-06-21	28	2020-06-01	2020-05-31	30	1			1
Spain	Self-isolation	Presence	Target	Guadeloupe	2020-05-25	2020-06-21	28	2020-06-01	2020-05-31	30	1			1
Spain	Self-isolation	Presence	Target	Guam	2020-05-25	2020-06-21	28	2020-06-01	2020-05-31	30	1			1
Spain	Self-isolation	Presence	Target	Guatemala	2020-05-25	2020-06-21	28	2020-06-01	2020-05-31	30	1			1
Spain	Self-isolation	Presence	Target	Guinea	2020-05-25	2020-06-21	28	2020-06-01	2020-05-31	30	1			1
Spain	Self-isolation	Presence	Target	Guinea-Bissau	2020-05-25	2020-06-21	28	2020-06-01	2020-05-31	30	1			1
Spain	Self-isolation	Presence	Target	Guyana	2020-05-25	2020-06-21	28	2020-06-01	2020-05-31	30	1			1
Spain	Self-isolation	Presence	Target	Haiti	2020-05-25	2020-06-21	28	2020-06-01	2020-05-31	30	1			1
Spain	Self-isolation	Presence	Target	Honduras	2020-05-25	2020-06-21	28	2020-06-01	2020-05-31	30	1			1
Spain	Self-isolation	Presence	Target	Hong Kong	2020-05-25	2020-06-21	28	2020-06-01	2020-05-31	30	1			1
Spain	Self-isolation	Presence	Target	Hungary	2020-05-25	2020-06-21	28	2020-06-01	2020-05-31	30	1			1
Spain	Self-isolation	Presence	Target	Iceland	2020-05-25	2020-06-21	28	2020-06-01	2020-05-31	30	1			1
Spain	Self-isolation	Presence	Target	India	2020-05-25	2020-06-21	28	2020-06-01	2020-05-31	30	1			1
Spain	Self-isolation	Presence	Target	Indonesia	2020-05-25	2020-06-21	28	2020-06-01	2020-05-31	30	1			1
Spain	Self-isolation	Presence	Target	Iran	2020-05-25	2020-06-21	28	2020-06-01	2020-05-31	30	1			1
Spain	Self-isolation	Presence	Target	Iraq	2020-05-25	2020-06-21	28	2020-06-01	2020-05-31	30	1			1
Spain	Self-isolation	Presence	Target	Ireland	2020-05-25	2020-06-21	28	2020-06-01	2020-05-31	30	1			1
Spain	Self-isolation	Presence	Target	Israel	2020-05-25	2020-06-21	28	2020-06-01	2020-05-31	30	1			1
Spain	Self-isolation	Presence	Target	Italy	2020-05-25	2020-06-21	28	2020-06-01	2020-05-31	30	1			1
Spain	Self-isolation	Presence	Target	Jamaica	2020-05-25	2020-06-21	28	2020-06-01	2020-05-31	30	1			1
Spain	Self-isolation	Presence	Target	Japan	2020-05-25	2020-06-21	28	2020-06-01	2020-05-31	30	1			1
Spain	Self-isolation	Presence	Target	Jordan	2020-05-25	2020-06-21	28	2020-06-01	2020-05-31	30	1			1
Spain	Self-isolation	Presence	Target	Kazakhstan	2020-05-25	2020-06-21	28	2020-06-01	2020-05-31	30	1			1
Spain	Self-isolation	Presence	Target	Kenya	2020-05-25	2020-06-21	28	2020-06-01	2020-05-31	30	1			1
Spain	Self-isolation	Presence	Target	Kosovo	2020-05-25	2020-06-21	28	2020-06-01	2020-05-31	30	1			1
Spain	Self-isolation	Presence	Target	Kuwait	2020-05-25	2020-06-21	28	2020-06-01	2020-05-31	30	1			1
Spain	Self-isolation	Presence	Target	Kyrgyzstan	2020-05-25	2020-06-21	28	2020-06-01	2020-05-31	30	1			1
Spain	Self-isolation	Presence	Target	Laos	2020-05-25	2020-06-21	28	2020-06-01	2020-05-31	30	1			1
Spain	Self-isolation	Presence	Target	Latvia	2020-05-25	2020-06-21	28	2020-06-01	2020-05-31	30	1			1
Spain	Self-isolation	Presence	Target	Lebanon	2020-05-25	2020-06-21	28	2020-06-01	2020-05-31	30	1			1
Spain	Self-isolation	Presence	Target	Lesotho	2020-05-25	2020-06-21	28	2020-06-01	2020-05-31	30	1			1
Spain	Self-isolation	Presence	Target	Liberia	2020-05-25	2020-06-21	28	2020-06-01	2020-05-31	30	1			1
Spain	Self-isolation	Presence	Target	Libya	2020-05-25	2020-06-21	28	2020-06-01	2020-05-31	30	1			1
Spain	Self-isolation	Presence	Target	Liechtenstein	2020-05-25	2020-06-21	28	2020-06-01	2020-05-31	30	1			1
Spain	Self-isolation	Presence	Target	Lithuania	2020-05-25	2020-06-21	28	2020-06-01	2020-05-31	30	1			1
Spain	Self-isolation	Presence	Target	Luxembourg	2020-05-25	2020-06-21	28	2020-06-01	2020-05-31	30	1			1
Spain	Self-isolation	Presence	Target	Macao	2020-05-25	2020-06-21	28	2020-06-01	2020-05-31	30	1			1
Spain	Self-isolation	Presence	Target	Macedonia	2020-05-25	2020-06-21	28	2020-06-01	2020-05-31	30	1			1
Spain	Self-isolation	Presence	Target	Madagascar	2020-05-25	2020-06-21	28	2020-06-01	2020-05-31	30	1			1
Spain	Self-isolation	Presence	Target	Malawi	2020-05-25	2020-06-21	28	2020-06-01	2020-05-31	30	1			1
Spain	Self-isolation	Presence	Target	Malaysia	2020-05-25	2020-06-21	28	2020-06-01	2020-05-31	30	1			1
Spain	Self-isolation	Presence	Target	Maldives	2020-05-25	2020-06-21	28	2020-06-01	2020-05-31	30	1			1
Spain	Self-isolation	Presence	Target	Mali	2020-05-25	2020-06-21	28	2020-06-01	2020-05-31	30	1			1
Spain	Self-isolation	Presence	Target	Malta	2020-05-25	2020-06-21	28	2020-06-01	2020-05-31	30	1			1
Spain	Self-isolation	Presence	Target	Mauritania	2020-05-25	2020-06-21	28	2020-06-01	2020-05-31	30	1			1
Spain	Self-isolation	Presence	Target	Mauritius	2020-05-25	2020-06-21	28	2020-06-01	2020-05-31	30	1			1
Spain	Self-isolation	Presence	Target	Mexico	2020-05-25	2020-06-21	28	2020-06-01	2020-05-31	30	1			1
Spain	Self-isolation	Presence	Target	Micronesia	2020-05-25	2020-06-21	28	2020-06-01	2020-05-31	30	1			1
Spain	Self-isolation	Presence	Target	Moldova	2020-05-25	2020-06-21	28	2020-06-01	2020-05-31	30	1			1
Spain	Self-isolation	Presence	Target	Monaco	2020-05-25	2020-06-21	28	2020-06-01	2020-05-31	30	1			1
Spain	Self-isolation	Presence	Target	Mongolia	2020-05-25	2020-06-21	28	2020-06-01	2020-05-31	30	1			1
Spain	Self-isolation	Presence	Target	Montenegro	2020-05-25	2020-06-21	28	2020-06-01	2020-05-31	30	1			1
Spain	Self-isolation	Presence	Target	Montserrat	2020-05-25	2020-06-21	28	2020-06-01	2020-05-31	30	1			1
Spain	Self-isolation	Presence	Target	Morocco	2020-05-25	2020-06-21	28	2020-06-01	2020-05-31	30	1			1
Spain	Self-isolation	Presence	Target	Mozambique	2020-05-25	2020-06-21	28	2020-06-01	2020-05-31	30	1			1
Spain	Self-isolation	Presence	Target	Myanmar	2020-05-25	2020-06-21	28	2020-06-01	2020-05-31	30	1			1
Spain	Self-isolation	Presence	Target	Namibia	2020-05-25	2020-06-21	28	2020-06-01	2020-05-31	30	1			1
Spain	Self-isolation	Presence	Target	Nauru	2020-05-25	2020-06-21	28	2020-06-01	2020-05-31	30	1			1
Spain	Self-isolation	Presence	Target	Nepal	2020-05-25	2020-06-21	28	2020-06-01	2020-05-31	30	1			1
Spain	Self-isolation	Presence	Target	Netherlands	2020-05-25	2020-06-21	28	2020-06-01	2020-05-31	30	1			1
Spain	Self-isolation	Presence	Target	New Caledonia	2020-05-25	2020-06-21	28	2020-06-01	2020-05-31	30	1			1
Spain	Self-isolation	Presence	Target	New Zealand	2020-05-25	2020-06-21	28	2020-06-01	2020-05-31	30	1			1
Spain	Self-isolation	Presence	Target	Nicaragua	2020-05-25	2020-06-21	28	2020-06-01	2020-05-31	30	1			1
Spain	Self-isolation	Presence	Target	Niger	2020-05-25	2020-06-21	28	2020-06-01	2020-05-31	30	1			1
Spain	Self-isolation	Presence	Target	Nigeria	2020-05-25	2020-06-21	28	2020-06-01	2020-05-31	30	1			1
Spain	Self-isolation	Presence	Target	North Korea	2020-05-25	2020-06-21	28	2020-06-01	2020-05-31	30	1			1
Spain	Self-isolation	Presence	Target	Norway	2020-05-25	2020-06-21	28	2020-06-01	2020-05-31	30	1			1
Spain	Self-isolation	Presence	Target	Oman	2020-05-25	2020-06-21	28	2020-06-01	2020-05-31	30	1			1
Spain	Self-isolation	Presence	Target	Pakistan	2020-05-25	2020-06-21	28	2020-06-01	2020-05-31	30	1			1
Spain	Self-isolation	Presence	Target	Palau	2020-05-25	2020-06-21	28	2020-06-01	2020-05-31	30	1			1
Spain	Self-isolation	Presence	Target	Palestine	2020-05-25	2020-06-21	28	2020-06-01	2020-05-31	30	1			1
Spain	Self-isolation	Presence	Target	Panama	2020-05-25	2020-06-21	28	2020-06-01	2020-05-31	30	1			1
Spain	Self-isolation	Presence	Target	Papua New Guinea	2020-05-25	2020-06-21	28	2020-06-01	2020-05-31	30	1			1
Spain	Self-isolation	Presence	Target	Paraguay	2020-05-25	2020-06-21	28	2020-06-01	2020-05-31	30	1			1
Spain	Self-isolation	Presence	Target	Peru	2020-05-25	2020-06-21	28	2020-06-01	2020-05-31	30	1			1
Spain	Self-isolation	Presence	Target	Philippines	2020-05-25	2020-06-21	28	2020-06-01	2020-05-31	30	1			1
Spain	Self-isolation	Presence	Target	Poland	2020-05-25	2020-06-21	28	2020-06-01	2020-05-31	30	1			1
Spain	Self-isolation	Presence	Target	Portugal	2020-05-25	2020-06-21	28	2020-06-01	2020-05-31	30	1			1
Spain	Self-isolation	Presence	Target	Qatar	2020-05-25	2020-06-21	28	2020-06-01	2020-05-31	30	1			1
Spain	Self-isolation	Presence	Target	Romania	2020-05-25	2020-06-21	28	2020-06-01	2020-05-31	30	1			1
Spain	Self-isolation	Presence	Target	Russia	2020-05-25	2020-06-21	28	2020-06-01	2020-05-31	30	1			1
Spain	Self-isolation	Presence	Target	Rwanda	2020-05-25	2020-06-21	28	2020-06-01	2020-05-31	30	1			1
Spain	Self-isolation	Presence	Target	Saint Kitts and Nevis	2020-05-25	2020-06-21	28	2020-06-01	2020-05-31	30	1			1
Spain	Self-isolation	Presence	Target	Saint Lucia	2020-05-25	2020-06-21	28	2020-06-01	2020-05-31	30	1			1
Spain	Self-isolation	Presence	Target	Saint Pierre and Miquelon	2020-05-25	2020-06-21	28	2020-06-01	2020-05-31	30	1			1
Spain	Self-isolation	Presence	Target	Saint Vincent and the Grenadines	2020-05-25	2020-06-21	28	2020-06-01	2020-05-31	30	1			1
Spain	Self-isolation	Presence	Target	Samoa	2020-05-25	2020-06-21	28	2020-06-01	2020-05-31	30	1			1
Spain	Self-isolation	Presence	Target	San Marino	2020-05-25	2020-06-21	28	2020-06-01	2020-05-31	30	1			1
Spain	Self-isolation	Presence	Target	São Tomé and Príncipe	2020-05-25	2020-06-21	28	2020-06-01	2020-05-31	30	1			1
Spain	Self-isolation	Presence	Target	Saudi Arabia	2020-05-25	2020-06-21	28	2020-06-01	2020-05-31	30	1			1
Spain	Self-isolation	Presence	Target	Senegal	2020-05-25	2020-06-21	28	2020-06-01	2020-05-31	30	1			1
Spain	Self-isolation	Presence	Target	Serbia	2020-05-25	2020-06-21	56	2020-06-01	2020-05-31	30	1			1
Spain	Self-isolation	Presence	Target	Seychelles	2020-05-25	2020-06-21	28	2020-06-01	2020-05-31	30	1			1
Spain	Self-isolation	Presence	Target	Sierra Leone	2020-05-25	2020-06-21	28	2020-06-01	2020-05-31	30	1			1
Spain	Self-isolation	Presence	Target	Singapore	2020-05-25	2020-06-21	28	2020-06-01	2020-05-31	30	1			1
Spain	Self-isolation	Presence	Target	Slovakia	2020-05-25	2020-06-21	28	2020-06-01	2020-05-31	30	1			1
Spain	Self-isolation	Presence	Target	Slovenia	2020-05-25	2020-06-21	28	2020-06-01	2020-05-31	30	1			1
Spain	Self-isolation	Presence	Target	Solomon Islands	2020-05-25	2020-06-21	28	2020-06-01	2020-05-31	30	1			1
Spain	Self-isolation	Presence	Target	Somalia	2020-05-25	2020-06-21	28	2020-06-01	2020-05-31	30	1			1
Spain	Self-isolation	Presence	Target	South Africa	2020-05-25	2020-06-21	28	2020-06-01	2020-05-31	30	1			1
Spain	Self-isolation	Presence	Target	South Korea	2020-05-25	2020-06-21	28	2020-06-01	2020-05-31	30	1			1
Spain	Self-isolation	Presence	Target	South Sudan	2020-05-25	2020-06-21	28	2020-06-01	2020-05-31	30	1			1
Spain	Self-isolation	Presence	Target	Spain	2020-05-25	2020-06-21	56	2020-06-01	2020-05-31	30	1			1
Spain	Self-isolation	Presence	Target	Sri Lanka	2020-05-25	2020-06-21	28	2020-06-01	2020-05-31	30	1			1
Spain	Self-isolation	Presence	Target	Sudan	2020-05-25	2020-06-21	28	2020-06-01	2020-05-31	30	1			1
Spain	Self-isolation	Presence	Target	Suriname	2020-05-25	2020-06-21	28	2020-06-01	2020-05-31	30	1			1
Spain	Self-isolation	Presence	Target	Svalbard and Jan Mayen	2020-05-25	2020-06-21	28	2020-06-01	2020-05-31	30	1			1
Spain	Self-isolation	Presence	Target	Swaziland	2020-05-25	2020-06-21	28	2020-06-01	2020-05-31	30	1			1
Spain	Self-isolation	Presence	Target	Sweden	2020-05-25	2020-06-21	28	2020-06-01	2020-05-31	30	1			1
Spain	Self-isolation	Presence	Target	Switzerland	2020-05-25	2020-06-21	28	2020-06-01	2020-05-31	30	1			1
Spain	Self-isolation	Presence	Target	Syria	2020-05-25	2020-06-21	28	2020-06-01	2020-05-31	30	1			1
Spain	Self-isolation	Presence	Target	Taiwan	2020-05-25	2020-06-21	28	2020-06-01	2020-05-31	30	1			1
Spain	Self-isolation	Presence	Target	Tajikistan	2020-05-25	2020-06-21	28	2020-06-01	2020-05-31	30	1			1
Spain	Self-isolation	Presence	Target	Tanzania	2020-05-25	2020-06-21	28	2020-06-01	2020-05-31	30	1			1
Spain	Self-isolation	Presence	Target	Thailand	2020-05-25	2020-06-21	28	2020-06-01	2020-05-31	30	1			1
Spain	Self-isolation	Presence	Target	Timor-Leste	2020-05-25	2020-06-21	28	2020-06-01	2020-05-31	30	1			1
Spain	Self-isolation	Presence	Target	Togo	2020-05-25	2020-06-21	28	2020-06-01	2020-05-31	30	1			1
Spain	Self-isolation	Presence	Target	Tonga	2020-05-25	2020-06-21	28	2020-06-01	2020-05-31	30	1			1
Spain	Self-isolation	Presence	Target	Trinidad and Tobago	2020-05-25	2020-06-21	28	2020-06-01	2020-05-31	30	1			1
Spain	Self-isolation	Presence	Target	Tunisia	2020-05-25	2020-06-21	28	2020-06-01	2020-05-31	30	1			1
Spain	Self-isolation	Presence	Target	Turkey	2020-05-25	2020-06-21	28	2020-06-01	2020-05-31	30	1			1
Spain	Self-isolation	Presence	Target	Turkmenistan	2020-05-25	2020-06-21	28	2020-06-01	2020-05-31	30	1			1
Spain	Self-isolation	Presence	Target	Tuvalu	2020-05-25	2020-06-21	28	2020-06-01	2020-05-31	30	1			1
Spain	Self-isolation	Presence	Target	Uganda	2020-05-25	2020-06-21	28	2020-06-01	2020-05-31	30	1			1
Spain	Self-isolation	Presence	Target	Ukraine	2020-05-25	2020-06-21	28	2020-06-01	2020-05-31	30	1			1
Spain	Self-isolation	Presence	Target	United Arab Emirates	2020-05-25	2020-06-21	28	2020-06-01	2020-05-31	30	1			1
Spain	Self-isolation	Presence	Target	United Kingdom	2020-05-25	2020-06-21	28	2020-06-01	2020-05-31	30	1			1
Spain	Self-isolation	Presence	Target	United States	2020-05-25	2020-06-21	56	2020-06-01	2020-05-31	30	1			1
Spain	Self-isolation	Presence	Target	Uruguay	2020-05-25	2020-06-21	28	2020-06-01	2020-05-31	30	1			1
Spain	Self-isolation	Presence	Target	Uzbekistan	2020-05-25	2020-06-21	28	2020-06-01	2020-05-31	30	1			1
Spain	Self-isolation	Presence	Target	Vanuatu	2020-05-25	2020-06-21	28	2020-06-01	2020-05-31	30	1			1
Spain	Self-isolation	Presence	Target	Vatican City	2020-05-25	2020-06-21	28	2020-06-01	2020-05-31	30	1			1
Spain	Self-isolation	Presence	Target	Venezuela	2020-05-25	2020-06-21	28	2020-06-01	2020-05-31	30	1			1
Spain	Self-isolation	Presence	Target	Vietnam	2020-05-25	2020-06-21	28	2020-06-01	2020-05-31	30	1			1
Spain	Self-isolation	Presence	Target	Western Sahara	2020-05-25	2020-06-21	28	2020-06-01	2020-05-31	30	1			1
Spain	Self-isolation	Presence	Target	Yemen	2020-05-25	2020-06-21	28	2020-06-01	2020-05-31	30	1			1
Spain	Self-isolation	Presence	Target	Zambia	2020-05-25	2020-06-21	28	2020-06-01	2020-05-31	30	1			1
Spain	Self-isolation	Presence	Target	Zimbabwe	2020-05-25	2020-06-21	28	2020-06-01	2020-05-31	30	1			1
Switzerland	No entry	Presence	Exception	Family of residents / nationals				2020-06-01	2020-05-31	32	0			1
Switzerland	No entry	Presence	Exception	Humanitarian / aid workers	2020-04-03	2020-06-29	88	2020-04-01	2020-05-31	85	1			1
Switzerland	No entry	Presence	Exception	Nationals	2020-03-17	2020-06-29	105	2020-04-01	2020-05-31	87	1			1
Switzerland	No entry	Presence	Exception	Nationals of partner countries	2020-03-31	2020-06-29	179	2020-04-01	2020-05-31	85	1			1
Switzerland	No entry	Presence	Exception	Other exception (specific)	2020-06-15	2020-06-29	15				0			1
Switzerland	No entry	Presence	Exception	Passengers in transit				2020-04-01	2020-05-31	83	0			1
Switzerland	No entry	Presence	Exception	Residents	2020-03-17	2020-06-29	104	2020-04-01	2020-05-31	87	1			1
Switzerland	No entry	Presence	Exception	Work or business related travel	2020-03-19	2020-06-29	206	2020-04-01	2020-05-31	85	1			1
Switzerland	No entry	Presence	Target	Afghanistan	2020-03-18	2020-06-29	104	2020-04-01	2020-05-31	85	1			1
Switzerland	No entry	Presence	Target	Albania	2020-03-19	2020-06-29	103	2020-04-01	2020-05-31	85	1			1
Switzerland	No entry	Presence	Target	Algeria	2020-03-19	2020-06-29	103	2020-04-01	2020-05-31	85	1			1
Switzerland	No entry	Presence	Target	Andorra	2020-03-19	2020-06-29	103	2020-04-01	2020-05-31	85	1			1
Switzerland	No entry	Presence	Target	Angola	2020-03-19	2020-06-29	103	2020-04-01	2020-05-31	85	1			1
Switzerland	No entry	Presence	Target	Antigua and Barbuda	2020-03-19	2020-06-29	103	2020-04-01	2020-05-31	85	1			1
Switzerland	No entry	Presence	Target	Argentina	2020-03-19	2020-06-29	103	2020-04-01	2020-05-31	85	1			1
Switzerland	No entry	Presence	Target	Armenia	2020-03-19	2020-06-29	103	2020-04-01	2020-05-31	85	1			1
Switzerland	No entry	Presence	Target	Australia	2020-03-19	2020-06-29	103	2020-04-01	2020-05-31	85	1			1
Switzerland	No entry	Presence	Target	Austria	2020-03-17	2020-06-14	89	2020-04-01	2020-05-31	85	1			1
Switzerland	No entry	Presence	Target	Azerbaijan	2020-03-19	2020-06-29	103	2020-04-01	2020-05-31	85	1			1
Switzerland	No entry	Presence	Target	Bahamas	2020-03-19	2020-06-29	103	2020-04-01	2020-05-31	85	1			1
Switzerland	No entry	Presence	Target	Bahrain	2020-03-19	2020-06-29	103	2020-04-01	2020-05-31	85	1			1
Switzerland	No entry	Presence	Target	Bangladesh	2020-03-19	2020-06-29	103	2020-04-01	2020-05-31	85	1			1
Switzerland	No entry	Presence	Target	Barbados	2020-03-19	2020-06-29	103	2020-04-01	2020-05-31	85	1			1
Switzerland	No entry	Presence	Target	Belarus	2020-03-19	2020-06-29	103	2020-04-01	2020-05-31	85	1			1
Switzerland	No entry	Presence	Target	Belgium	2020-04-09	2020-06-14	67	2020-04-01	2020-05-31	85	1			1
Switzerland	No entry	Presence	Target	Belize	2020-03-19	2020-06-29	103	2020-04-01	2020-05-31	85	1			1
Switzerland	No entry	Presence	Target	Benin	2020-03-19	2020-06-29	103	2020-04-01	2020-05-31	85	1			1
Switzerland	No entry	Presence	Target	Bermuda	2020-03-19	2020-06-29	103	2020-04-01	2020-05-31	85	1			1
Switzerland	No entry	Presence	Target	Bhutan	2020-03-19	2020-06-29	103	2020-04-01	2020-05-31	85	1			1
Switzerland	No entry	Presence	Target	Bolivia	2020-03-19	2020-06-29	103	2020-04-01	2020-05-31	85	1			1
Switzerland	No entry	Presence	Target	Bosnia and Herzegovina	2020-03-19	2020-06-29	103	2020-04-01	2020-05-31	85	1			1
Switzerland	No entry	Presence	Target	Botswana	2020-03-19	2020-06-29	103	2020-04-01	2020-05-31	85	1			1
Switzerland	No entry	Presence	Target	Brazil	2020-03-19	2020-06-29	103	2020-04-01	2020-05-31	85	1			1
Switzerland	No entry	Presence	Target	British Virgin Islands	2020-03-19	2020-06-29	103	2020-04-01	2020-05-31	85	1			1
Switzerland	No entry	Presence	Target	Brunei	2020-03-19	2020-06-29	103	2020-04-01	2020-05-31	85	1			1
Switzerland	No entry	Presence	Target	Bulgaria	2020-04-09	2020-06-14	67	2020-04-01	2020-05-31	85	1			1
Switzerland	No entry	Presence	Target	Burkina Faso	2020-03-19	2020-06-29	103	2020-04-01	2020-05-31	85	1			1
Switzerland	No entry	Presence	Target	Burundi	2020-03-19	2020-06-29	103	2020-04-01	2020-05-31	85	1			1
Switzerland	No entry	Presence	Target	Buthan				2020-04-01	2020-05-31	85	0			1
Switzerland	No entry	Presence	Target	Cambodia	2020-03-19	2020-06-29	103	2020-04-01	2020-05-31	85	1			1
Switzerland	No entry	Presence	Target	Cameroon	2020-03-19	2020-06-29	103	2020-04-01	2020-05-31	85	1			1
Switzerland	No entry	Presence	Target	Canada	2020-03-19	2020-06-29	103	2020-04-01	2020-05-31	85	1			1
Switzerland	No entry	Presence	Target	Cape Verde	2020-03-19	2020-06-29	103	2020-04-01	2020-05-31	85	1			1
Switzerland	No entry	Presence	Target	Cayman Islands	2020-03-19	2020-06-29	103	2020-04-01	2020-05-31	85	1			1
Switzerland	No entry	Presence	Target	Central African Republic	2020-03-19	2020-06-29	103	2020-04-01	2020-05-31	85	1			1
Switzerland	No entry	Presence	Target	Chad	2020-03-19	2020-06-29	103	2020-04-01	2020-05-31	85	1			1
Switzerland	No entry	Presence	Target	Chile	2020-03-19	2020-06-29	103	2020-04-01	2020-05-31	85	1			1
Switzerland	No entry	Presence	Target	China	2020-03-18	2020-06-29	104	2020-04-01	2020-05-31	87	1			1
Switzerland	No entry	Presence	Target	Colombia	2020-03-19	2020-06-29	103	2020-04-01	2020-05-31	85	1			1
Switzerland	No entry	Presence	Target	Comoros	2020-03-19	2020-06-29	103	2020-04-01	2020-05-31	85	1			1
Switzerland	No entry	Presence	Target	Congo (Brazzaville)	2020-03-19	2020-06-29	103	2020-04-01	2020-05-31	85	1			1
Switzerland	No entry	Presence	Target	Congo (Kinshasa)	2020-03-19	2020-06-29	103	2020-04-01	2020-05-31	85	1			1
Switzerland	No entry	Presence	Target	Costa Rica	2020-03-19	2020-06-29	103	2020-04-01	2020-05-31	85	1			1
Switzerland	No entry	Presence	Target	Côte d'Ivoire	2020-03-19	2020-06-29	103	2020-04-01	2020-05-31	85	1			1
Switzerland	No entry	Presence	Target	Croatia	2020-04-09	2020-06-14	67	2020-04-01	2020-05-31	85	1			1
Switzerland	No entry	Presence	Target	Cuba	2020-03-19	2020-06-29	103	2020-04-01	2020-05-31	85	1			1
Switzerland	No entry	Presence	Target	Curaçao	2020-03-19	2020-06-29	103	2020-04-01	2020-05-31	85	1			1
Switzerland	No entry	Presence	Target	Cyprus	2020-04-09	2020-06-14	67	2020-04-01	2020-05-31	85	1			1
Switzerland	No entry	Presence	Target	Czech Republic	2020-04-09	2020-06-14	134	2020-04-01	2020-05-31	85	1			1
Switzerland	No entry	Presence	Target	Denmark	2020-04-09	2020-06-14	67	2020-04-01	2020-05-31	85	1			1
Switzerland	No entry	Presence	Target	Djibouti	2020-03-19	2020-06-29	103	2020-04-01	2020-05-31	85	1			1
Switzerland	No entry	Presence	Target	Dominica	2020-03-19	2020-06-29	103	2020-04-01	2020-05-31	85	1			1
Switzerland	No entry	Presence	Target	Dominican Republic	2020-03-19	2020-06-29	103	2020-04-01	2020-05-31	85	1			1
Switzerland	No entry	Presence	Target	Ecuador	2020-03-19	2020-06-29	103	2020-04-01	2020-05-31	85	1			1
Switzerland	No entry	Presence	Target	Egypt	2020-03-19	2020-06-29	103	2020-04-01	2020-05-31	85	1			1
Switzerland	No entry	Presence	Target	El Salvador	2020-03-19	2020-06-29	103	2020-04-01	2020-05-31	85	1			1
Switzerland	No entry	Presence	Target	Equatorial Guinea	2020-03-19	2020-06-29	103	2020-04-01	2020-05-31	85	1			1
Switzerland	No entry	Presence	Target	Eritrea	2020-03-19	2020-06-29	103	2020-04-01	2020-05-31	85	1			1
Switzerland	No entry	Presence	Target	Estonia	2020-04-09	2020-06-14	67	2020-04-01	2020-05-31	85	1			1
Switzerland	No entry	Presence	Target	Ethiopia	2020-03-19	2020-06-29	103	2020-04-01	2020-05-31	85	1			1
Switzerland	No entry	Presence	Target	Faeroe Islands	2020-03-19	2020-06-29	103	2020-04-01	2020-05-31	85	1			1
Switzerland	No entry	Presence	Target	Falkland Islands	2020-03-19	2020-06-29	103	2020-04-01	2020-05-31	85	1			1
Switzerland	No entry	Presence	Target	Fiji	2020-03-19	2020-06-29	103	2020-04-01	2020-05-31	85	1			1
Switzerland	No entry	Presence	Target	Finland	2020-04-09	2020-06-14	67	2020-04-01	2020-05-31	85	1			1
Switzerland	No entry	Presence	Target	France	2020-03-17	2020-06-14	68	2020-04-01	2020-05-31	87	1			1
Switzerland	No entry	Presence	Target	Gabon	2020-03-19	2020-06-29	103	2020-04-01	2020-05-31	85	1			1
Switzerland	No entry	Presence	Target	Gambia	2020-03-19	2020-06-29	103	2020-04-01	2020-05-31	85	1			1
Switzerland	No entry	Presence	Target	Georgia	2020-03-19	2020-06-29	103	2020-04-01	2020-05-31	85	1			1
Switzerland	No entry	Presence	Target	Germany	2020-03-17	2020-06-14	89	2020-04-01	2020-05-31	85	1			1
Switzerland	No entry	Presence	Target	Ghana	2020-03-19	2020-06-29	103	2020-04-01	2020-05-31	85	1			1
Switzerland	No entry	Presence	Target	Gibraltar	2020-03-19	2020-06-29	103	2020-04-01	2020-05-31	85	1			1
Switzerland	No entry	Presence	Target	Greece	2020-04-09	2020-06-14	67	2020-04-01	2020-05-31	85	1			1
Switzerland	No entry	Presence	Target	Grenada	2020-03-19	2020-06-29	103	2020-04-01	2020-05-31	85	1			1
Switzerland	No entry	Presence	Target	Guadeloupe	2020-03-19	2020-06-29	103	2020-04-01	2020-05-31	85	1			1
Switzerland	No entry	Presence	Target	Guam	2020-03-19	2020-06-29	103	2020-04-01	2020-05-31	85	1			1
Switzerland	No entry	Presence	Target	Guatemala	2020-03-19	2020-06-29	103	2020-04-01	2020-05-31	85	1			1
Switzerland	No entry	Presence	Target	Guinea	2020-03-19	2020-06-29	103	2020-04-01	2020-05-31	85	1			1
Switzerland	No entry	Presence	Target	Guinea-Bissau	2020-03-19	2020-06-29	103	2020-04-01	2020-05-31	85	1			1
Switzerland	No entry	Presence	Target	Guyana	2020-03-19	2020-06-29	103	2020-04-01	2020-05-31	85	1			1
Switzerland	No entry	Presence	Target	Haiti	2020-03-19	2020-06-29	103	2020-04-01	2020-05-31	85	1			1
Switzerland	No entry	Presence	Target	Honduras	2020-03-19	2020-06-29	103	2020-04-01	2020-05-31	85	1			1
Switzerland	No entry	Presence	Target	Hong Kong	2020-03-19	2020-06-29	103	2020-04-01	2020-05-31	85	1			1
Switzerland	No entry	Presence	Target	Hungary	2020-04-09	2020-06-14	67	2020-04-01	2020-05-31	85	1			1
Switzerland	No entry	Presence	Target	Iceland	2020-04-09	2020-06-14	67	2020-04-01	2020-05-31	85	1			1
Switzerland	No entry	Presence	Target	India	2020-03-19	2020-06-29	103	2020-04-01	2020-05-31	85	1			1
Switzerland	No entry	Presence	Target	Indonesia	2020-03-19	2020-06-29	103	2020-04-01	2020-05-31	85	1			1
Switzerland	No entry	Presence	Target	Iran	2020-03-18	2020-06-29	104	2020-04-01	2020-05-31	87	1			1
Switzerland	No entry	Presence	Target	Iraq	2020-03-19	2020-06-29	103	2020-04-01	2020-05-31	85	1			1
Switzerland	No entry	Presence	Target	Ireland	2020-04-09	2020-06-14	67	2020-04-01	2020-05-31	85	1			1
Switzerland	No entry	Presence	Target	Israel	2020-03-19	2020-06-29	103	2020-04-01	2020-05-31	85	1			1
Switzerland	No entry	Presence	Target	Italy	2020-03-17	2020-06-14	90	2020-04-01	2020-05-31	87	1			1
Switzerland	No entry	Presence	Target	Jamaica	2020-03-19	2020-06-29	103	2020-04-01	2020-05-31	85	1			1
Switzerland	No entry	Presence	Target	Japan	2020-03-19	2020-06-29	103	2020-04-01	2020-05-31	85	1			1
Switzerland	No entry	Presence	Target	Jordan	2020-03-19	2020-06-29	103	2020-04-01	2020-05-31	85	1			1
Switzerland	No entry	Presence	Target	Kazakhstan	2020-03-19	2020-06-29	103	2020-04-01	2020-05-31	85	1			1
Switzerland	No entry	Presence	Target	Kenya	2020-03-19	2020-06-29	103	2020-04-01	2020-05-31	85	1			1
Switzerland	No entry	Presence	Target	Kosovo	2020-03-19	2020-06-29	103	2020-04-01	2020-05-31	85	1			1
Switzerland	No entry	Presence	Target	Kuwait	2020-03-19	2020-06-29	103	2020-04-01	2020-05-31	85	1			1
Switzerland	No entry	Presence	Target	Kyrgyzstan	2020-03-19	2020-06-29	103	2020-04-01	2020-05-31	85	1			1
Switzerland	No entry	Presence	Target	Laos	2020-03-19	2020-06-29	103	2020-04-01	2020-05-31	85	1			1
Switzerland	No entry	Presence	Target	Latvia	2020-04-09	2020-06-14	67	2020-04-01	2020-05-31	85	1			1
Switzerland	No entry	Presence	Target	Lebanon	2020-03-19	2020-06-29	103	2020-04-01	2020-05-31	85	1			1
Switzerland	No entry	Presence	Target	Lesotho	2020-03-19	2020-06-29	103	2020-04-01	2020-05-31	85	1			1
Switzerland	No entry	Presence	Target	Liberia	2020-03-19	2020-06-29	103	2020-04-01	2020-05-31	85	1			1
Switzerland	No entry	Presence	Target	Libya	2020-03-19	2020-06-29	103	2020-04-01	2020-05-31	85	1			1
Switzerland	No entry	Presence	Target	Liechtenstein	2020-04-09	2020-06-14	67	2020-04-01	2020-05-31	85	1			1
Switzerland	No entry	Presence	Target	Lithuania	2020-04-09	2020-06-14	67	2020-04-01	2020-05-31	85	1			1
Switzerland	No entry	Presence	Target	Luxembourg	2020-04-09	2020-06-14	67	2020-04-01	2020-05-31	85	1			1
Switzerland	No entry	Presence	Target	Macao	2020-03-19	2020-06-29	103	2020-04-01	2020-05-31	85	1			1
Switzerland	No entry	Presence	Target	Macedonia	2020-03-19	2020-06-29	103	2020-04-01	2020-05-31	85	1			1
Switzerland	No entry	Presence	Target	Madagascar	2020-03-19	2020-06-29	103	2020-04-01	2020-05-31	85	1			1
Switzerland	No entry	Presence	Target	Malawi	2020-03-19	2020-06-29	103	2020-04-01	2020-05-31	85	1			1
Switzerland	No entry	Presence	Target	Malaysia	2020-03-19	2020-06-29	103	2020-04-01	2020-05-31	85	1			1
Switzerland	No entry	Presence	Target	Maldives	2020-03-19	2020-06-29	103	2020-04-01	2020-05-31	85	1			1
Switzerland	No entry	Presence	Target	Mali	2020-03-19	2020-06-29	103	2020-04-01	2020-05-31	85	1			1
Switzerland	No entry	Presence	Target	Malta	2020-04-09	2020-06-14	67	2020-04-01	2020-05-31	85	1			1
Switzerland	No entry	Presence	Target	Mauritania	2020-03-19	2020-06-29	103	2020-04-01	2020-05-31	85	1			1
Switzerland	No entry	Presence	Target	Mauritius	2020-03-19	2020-06-29	103	2020-04-01	2020-05-31	85	1			1
Switzerland	No entry	Presence	Target	Mexico	2020-03-19	2020-06-29	103	2020-04-01	2020-05-31	85	1			1
Switzerland	No entry	Presence	Target	Micronesia	2020-03-19	2020-06-29	103	2020-04-01	2020-05-31	85	1			1
Switzerland	No entry	Presence	Target	Moldova	2020-03-19	2020-06-29	103	2020-04-01	2020-05-31	85	1			1
Switzerland	No entry	Presence	Target	Monaco	2020-03-19	2020-06-29	103	2020-04-01	2020-05-31	85	1			1
Switzerland	No entry	Presence	Target	Mongolia	2020-03-19	2020-06-29	103	2020-04-01	2020-05-31	85	1			1
Switzerland	No entry	Presence	Target	Montenegro	2020-03-19	2020-06-29	103	2020-04-01	2020-05-31	85	1			1
Switzerland	No entry	Presence	Target	Montserrat	2020-03-19	2020-06-29	103	2020-04-01	2020-05-31	85	1			1
Switzerland	No entry	Presence	Target	Morocco	2020-03-19	2020-06-29	103	2020-04-01	2020-05-31	85	1			1
Switzerland	No entry	Presence	Target	Mozambique	2020-03-19	2020-06-29	103	2020-04-01	2020-05-31	85	1			1
Switzerland	No entry	Presence	Target	Myanmar	2020-03-19	2020-06-29	103	2020-04-01	2020-05-31	85	1			1
Switzerland	No entry	Presence	Target	Namibia	2020-03-19	2020-06-29	103	2020-04-01	2020-05-31	85	1			1
Switzerland	No entry	Presence	Target	Nauru	2020-03-19	2020-06-29	103	2020-04-01	2020-05-31	85	1			1
Switzerland	No entry	Presence	Target	Nepal	2020-03-19	2020-06-29	103	2020-04-01	2020-05-31	85	1			1
Switzerland	No entry	Presence	Target	Netherlands	2020-04-09	2020-06-14	67	2020-04-01	2020-05-31	85	1			1
Switzerland	No entry	Presence	Target	New Caledonia	2020-03-19	2020-06-29	103	2020-04-01	2020-05-31	85	1			1
Switzerland	No entry	Presence	Target	New Zealand	2020-03-19	2020-06-29	103	2020-04-01	2020-05-31	85	1			1
Switzerland	No entry	Presence	Target	Nicaragua	2020-03-19	2020-06-29	103	2020-04-01	2020-05-31	85	1			1
Switzerland	No entry	Presence	Target	Niger	2020-03-19	2020-06-29	103	2020-04-01	2020-05-31	85	1			1
Switzerland	No entry	Presence	Target	Nigeria	2020-03-19	2020-06-29	103	2020-04-01	2020-05-31	85	1			1
Switzerland	No entry	Presence	Target	North Korea	2020-03-19	2020-06-29	103	2020-04-01	2020-05-31	85	1			1
Switzerland	No entry	Presence	Target	Norway	2020-04-09	2020-06-14	67	2020-04-01	2020-05-31	85	1			1
Switzerland	No entry	Presence	Target	Oman	2020-03-19	2020-06-29	103	2020-04-01	2020-05-31	85	1			1
Switzerland	No entry	Presence	Target	Pakistan	2020-03-19	2020-06-29	103	2020-04-01	2020-05-31	85	1			1
Switzerland	No entry	Presence	Target	Palau	2020-03-19	2020-06-29	103	2020-04-01	2020-05-31	85	1			1
Switzerland	No entry	Presence	Target	Palestine	2020-03-19	2020-06-29	103	2020-04-01	2020-05-31	85	1			1
Switzerland	No entry	Presence	Target	Panama	2020-03-19	2020-06-29	103	2020-04-01	2020-05-31	85	1			1
Switzerland	No entry	Presence	Target	Papua New Guinea	2020-03-19	2020-06-29	103	2020-04-01	2020-05-31	85	1			1
Switzerland	No entry	Presence	Target	Paraguay	2020-03-19	2020-06-29	103	2020-04-01	2020-05-31	85	1			1
Switzerland	No entry	Presence	Target	Peru	2020-03-19	2020-06-29	103	2020-04-01	2020-05-31	85	1			1
Switzerland	No entry	Presence	Target	Philippines	2020-03-19	2020-06-29	103	2020-04-01	2020-05-31	85	1			1
Switzerland	No entry	Presence	Target	Poland	2020-04-09	2020-06-14	67	2020-04-01	2020-05-31	85	1			1
Switzerland	No entry	Presence	Target	Portugal	2020-04-09	2020-06-14	67	2020-04-01	2020-05-31	85	1			1
Switzerland	No entry	Presence	Target	Qatar	2020-03-19	2020-06-29	103	2020-04-01	2020-05-31	85	1			1
Switzerland	No entry	Presence	Target	Romania	2020-04-09	2020-06-14	67	2020-04-01	2020-05-31	85	1			1
Switzerland	No entry	Presence	Target	Russia	2020-03-19	2020-06-29	103	2020-04-01	2020-05-31	85	1			1
Switzerland	No entry	Presence	Target	Rwanda	2020-03-19	2020-06-29	103	2020-04-01	2020-05-31	85	1			1
Switzerland	No entry	Presence	Target	Saint Kitts and Nevis	2020-03-19	2020-06-29	103	2020-04-01	2020-05-31	85	1			1
Switzerland	No entry	Presence	Target	Saint Lucia	2020-03-19	2020-06-29	103	2020-04-01	2020-05-31	85	1			1
Switzerland	No entry	Presence	Target	Saint Pierre and Miquelon	2020-03-19	2020-06-29	103	2020-04-01	2020-05-31	85	1			1
Switzerland	No entry	Presence	Target	Saint Vincent and the Grenadines	2020-03-19	2020-06-29	103	2020-04-01	2020-05-31	85	1			1
Switzerland	No entry	Presence	Target	Samoa	2020-03-19	2020-06-29	103	2020-04-01	2020-05-31	85	1			1
Switzerland	No entry	Presence	Target	San Marino	2020-03-19	2020-06-29	103	2020-04-01	2020-05-31	85	1			1
Switzerland	No entry	Presence	Target	São Tomé and Príncipe	2020-03-19	2020-06-29	103	2020-04-01	2020-05-31	85	1			1
Switzerland	No entry	Presence	Target	Saudi Arabia	2020-03-19	2020-06-29	103	2020-04-01	2020-05-31	85	1			1
Switzerland	No entry	Presence	Target	Senegal	2020-03-19	2020-06-29	103	2020-04-01	2020-05-31	85	1			1
Switzerland	No entry	Presence	Target	Serbia	2020-03-19	2020-06-29	206	2020-04-01	2020-05-31	85	1			1
Switzerland	No entry	Presence	Target	Seychelles	2020-03-19	2020-06-29	103	2020-04-01	2020-05-31	85	1			1
Switzerland	No entry	Presence	Target	Sierra Leone	2020-03-19	2020-06-29	103	2020-04-01	2020-05-31	85	1			1
Switzerland	No entry	Presence	Target	Singapore	2020-03-19	2020-06-29	103	2020-04-01	2020-05-31	85	1			1
Switzerland	No entry	Presence	Target	Slovakia	2020-04-09	2020-06-14	67	2020-04-01	2020-05-31	85	1			1
Switzerland	No entry	Presence	Target	Slovenia	2020-04-09	2020-06-14	67	2020-04-01	2020-05-31	85	1			1
Switzerland	No entry	Presence	Target	Solomon Islands	2020-03-19	2020-06-29	103	2020-04-01	2020-05-31	85	1			1
Switzerland	No entry	Presence	Target	Somalia	2020-03-19	2020-06-29	103	2020-04-01	2020-05-31	85	1			1
Switzerland	No entry	Presence	Target	South Africa	2020-03-19	2020-06-29	103	2020-04-01	2020-05-31	85	1			1
Switzerland	No entry	Presence	Target	South Korea	2020-03-18	2020-06-29	104	2020-04-01	2020-05-31	87	1			1
Switzerland	No entry	Presence	Target	South Sudan	2020-03-19	2020-06-29	103	2020-04-01	2020-05-31	85	1			1
Switzerland	No entry	Presence	Target	Spain	2020-03-19	2020-06-29	170	2020-04-01	2020-05-31	87	1			1
Switzerland	No entry	Presence	Target	Sri Lanka	2020-03-19	2020-06-29	103	2020-04-01	2020-05-31	85	1			1
Switzerland	No entry	Presence	Target	Sudan	2020-03-19	2020-06-29	103	2020-04-01	2020-05-31	85	1			1
Switzerland	No entry	Presence	Target	Suriname	2020-03-19	2020-06-29	103	2020-04-01	2020-05-31	85	1			1
Switzerland	No entry	Presence	Target	Svalbard and Jan Mayen	2020-03-19	2020-06-29	103	2020-04-01	2020-05-31	85	1			1
Switzerland	No entry	Presence	Target	Swaziland	2020-03-19	2020-06-29	103	2020-04-01	2020-05-31	85	1			1
Switzerland	No entry	Presence	Target	Sweden	2020-04-09	2020-06-14	67	2020-04-01	2020-05-31	85	1			1
Switzerland	No entry	Presence	Target	Switzerland	2020-04-09	2020-06-14	67	2020-04-01	2020-05-31	85	1			1
Switzerland	No entry	Presence	Target	Syria	2020-03-19	2020-06-29	103	2020-04-01	2020-05-31	85	1			1
Switzerland	No entry	Presence	Target	Taiwan	2020-03-19	2020-06-29	103	2020-04-01	2020-05-31	85	1			1
Switzerland	No entry	Presence	Target	Tajikistan	2020-03-19	2020-06-29	103	2020-04-01	2020-05-31	85	1			1
Switzerland	No entry	Presence	Target	Tanzania	2020-03-19	2020-06-29	103	2020-04-01	2020-05-31	85	1			1
Switzerland	No entry	Presence	Target	Thailand	2020-03-19	2020-06-29	103	2020-04-01	2020-05-31	85	1			1
Switzerland	No entry	Presence	Target	Timor-Leste	2020-03-19	2020-06-29	103	2020-04-01	2020-05-31	85	1			1
Switzerland	No entry	Presence	Target	Togo	2020-03-19	2020-06-29	103	2020-04-01	2020-05-31	85	1			1
Switzerland	No entry	Presence	Target	Tonga	2020-03-19	2020-06-29	103	2020-04-01	2020-05-31	85	1			1
Switzerland	No entry	Presence	Target	Trinidad and Tobago	2020-03-19	2020-06-29	103	2020-04-01	2020-05-31	85	1			1
Switzerland	No entry	Presence	Target	Tunisia	2020-03-19	2020-06-29	103	2020-04-01	2020-05-31	85	1			1
Switzerland	No entry	Presence	Target	Turkey	2020-03-19	2020-06-29	103	2020-04-01	2020-05-31	85	1			1
Switzerland	No entry	Presence	Target	Turkmenistan	2020-03-19	2020-06-29	103	2020-04-01	2020-05-31	85	1			1
Switzerland	No entry	Presence	Target	Tuvalu	2020-03-19	2020-06-29	103	2020-04-01	2020-05-31	85	1			1
Switzerland	No entry	Presence	Target	Uganda	2020-03-19	2020-06-29	103	2020-04-01	2020-05-31	85	1			1
Switzerland	No entry	Presence	Target	Ukraine	2020-03-19	2020-06-29	103	2020-04-01	2020-05-31	85	1			1
Switzerland	No entry	Presence	Target	United Arab Emirates	2020-03-19	2020-06-29	103	2020-04-01	2020-05-31	85	1			1
Switzerland	No entry	Presence	Target	United Kingdom	2020-03-19	2020-06-29	103	2020-04-01	2020-05-31	85	1			1
Switzerland	No entry	Presence	Target	United States	2020-03-19	2020-06-29	206	2020-04-01	2020-05-31	85	1			1
Switzerland	No entry	Presence	Target	Uruguay	2020-03-19	2020-06-29	103	2020-04-01	2020-05-31	85	1			1
Switzerland	No entry	Presence	Target	Uzbekistan	2020-03-19	2020-06-29	103	2020-04-01	2020-05-31	85	1			1
Switzerland	No entry	Presence	Target	Vanuatu	2020-03-19	2020-06-29	103	2020-04-01	2020-05-31	85	1			1
Switzerland	No entry	Presence	Target	Vatican City	2020-03-19	2020-06-29	103	2020-04-01	2020-05-31	85	1			1
Switzerland	No entry	Presence	Target	Venezuela	2020-03-19	2020-06-29	103	2020-04-01	2020-05-31	85	1			1
Switzerland	No entry	Presence	Target	Vietnam	2020-03-19	2020-06-29	103	2020-04-01	2020-05-31	85	1			1
Switzerland	No entry	Presence	Target	Western Sahara	2020-03-19	2020-06-29	103	2020-04-01	2020-05-31	85	1			1
Switzerland	No entry	Presence	Target	Yemen	2020-03-19	2020-06-29	103	2020-04-01	2020-05-31	85	1			1
Switzerland	No entry	Presence	Target	Zambia	2020-03-19	2020-06-29	103	2020-04-01	2020-05-31	85	1			1
Switzerland	No entry	Presence	Target	Zimbabwe	2020-03-19	2020-06-29	103	2020-04-01	2020-05-31	85	1			1
